# Supplementary material
Source: HighWire-hosted journal article supplement (http://thorax.bmjjournals.com/highwire/filestream/174130/field_highwire_adjunct_files/8/JB_Supplementary_Table_5.pdf)
Supplement: JB_Supplementary_Table_5.pdf [file JB_Supplementary_Table_5.pdf]

**Supplementary Table 5.** Clover results indicate the number of chromosomes with transcription factor binding motifs statistically over- or under-represented in HTE DHS within intergenic sequence (more than 2kb outside of any gene). Analysis was divided into three groups (all DHS, HTE-selective DHS, and ubiquitous DHS). Motifs with more than one entry in the databases utilized were edited to retain only the first occurrence of the motif.

| All DHS x Intergenic |              |          |          | TE-selective DHS x Intergenic |                       |          |          | Ubiquitous DHS x Intergenic |                         |          |          |
|----------------------|--------------|----------|----------|-------------------------------|-----------------------|----------|----------|-----------------------------|-------------------------|----------|----------|
| ID                   | Name         | p < 0.01 | p > 0.99 | ID                            | Name                  | p < 0.01 | p > 0.99 | ID                          | Name                    | p < 0.01 | p > 0.99 |
| MA0002.2             | RUNX1        | 23       | 0        | MA0080.2                      | SPI1                  | 23       | 0        | MA0055.1                    | Myf                     | 23       | 0        |
| MA0003.1             | TFAP2A       | 23       | 0        | MA0089.1                      | NFE2L1::MafG          | 23       | 0        | MA0068.1                    | Pax4                    | 23       | 0        |
| MA0039.2             | Klf4         | 23       | 0        | MA0098.1                      | ETS1                  | 23       | 0        | MA0080.2                    | SPI1                    | 23       | 0        |
| MA0055.1             | Myf          | 23       | 0        | MA0099.2                      | AP1                   | 23       | 0        | MA0098.1                    | ETS1                    | 23       | 0        |
| MA0056.1             | MZF1_1-4     | 23       | 0        | MA0136.1                      | ELF5                  | 23       | 0        | MA0139.1                    | CTCF                    | 23       | 0        |
| MA0079.2             | SP1          | 23       | 0        | MA0145.1                      | Tcfcp2l1              | 23       | 0        | V\$ALX3_01                  | ALX-3                   | 23       | 0        |
| MA0080.2             | SPI1         | 23       | 0        | MA0150.1                      | NFE2L2                | 23       | 0        | V\$ALX4_02                  | Alx-4                   | 23       | 0        |
| MA0081.1             | SPIB         | 23       | 0        | MA0156.1                      | FEV                   | 23       | 0        | V\$AMEF2_Q6                 | myocyte enhancer factor | 23       | 0        |
| MA0089.1             | NFE2L1::MafG | 23       | 0        | V\$AP1FJ_Q2                   | activator protein 1   | 23       | 0        | V\$AP1_01                   | AP-1                    | 23       | 0        |
| MA0090.1             | TEAD1        | 23       | 0        | V\$AP4_Q5                     | activator protein 4   | 23       | 0        | V\$AP2_Q6_01                | AP-2                    | 23       | 0        |
| MA0098.1             | ETS1         | 23       | 0        | V\$AR_Q6                      | half-site matrix      | 23       | 0        | V\$ARX_01                   | Arx                     | 23       | 0        |
| MA0099.2             | AP1          | 23       | 0        | V\$BACH1_01                   | BTB and CNC homolog 1 | 23       | 0        | V\$BARHL1_01                | Barhl-1                 | 23       | 0        |
| MA0136.1             | ELF5         | 23       | 0        | V\$BACH2_01                   | BTB and CNC homolog 2 | 23       | 0        | V\$BARHL2_01                | Barhl2                  | 23       | 0        |
| MA0139.1             | CTCF         | 23       | 0        | V\$CMAF_Q2                    | C-MAF                 | 23       | 0        | V\$BARX1_01                 | Barx1                   | 23       | 0        |
| MA0144.1             | Stat3        | 23       | 0        | V\$E12_Q6                     | E12                   | 23       | 0        | V\$BARX2_01                 | Barx-2                  | 23       | 0        |
| MA0145.1             | Tcfcp2l1     | 23       | 0        | V\$E2A_Q2                     | E2A                   | 23       | 0        | V\$BCL6_01                  | BCL6                    | 23       | 0        |
| MA0148.1             | FOXA1        | 23       | 0        | V\$ELF1_Q5                    | ELF1                  | 23       | 0        | V\$BEN_01                   | BEN                     | 23       | 0        |
| MA0150.1             | NFE2L2       | 23       | 0        | V\$ETS2_Q6                    | ETS2                  | 23       | 0        | V\$BRN3C_01                 | Brn-3c                  | 23       | 0        |
| MA0154.1             | EBF1         | 23       | 0        | V\$ETS_Q4                     | Ets                   | 23       | 0        | V\$BRN4_01                  | Brn-4                   | 23       | 0        |
| MA0156.1             | FEV          | 23       | 0        | V\$FRA1_Q5                    | FRA1                  | 23       | 0        | V\$BSX_01                   | Bsx                     | 23       | 0        |

|                |                       |    |   |                 |                                                    |    |   |                |                                                 |    |   |
|----------------|-----------------------|----|---|-----------------|----------------------------------------------------|----|---|----------------|-------------------------------------------------|----|---|
| MA0161.1       | NFIC                  | 23 | 0 | V\$GABPALPHA_Q4 | GABP-alpha                                         | 23 | 0 | V\$CART1_02    | CART1                                           | 23 | 0 |
| V\$AP1FJ_Q2    | activator protein 1   | 23 | 0 | V\$HEB_Q6       | HEB                                                | 23 | 0 | V\$CDP_03      | CDP                                             | 23 | 0 |
| V\$AP2_Q6_01   | AP-2                  | 23 | 0 | V\$LBP1_Q6      | LBP-1                                              | 23 | 0 | V\$CDX1_01     | Cdx-1                                           | 23 | 0 |
| V\$AP2ALPHA_01 | AP-2alpha             | 23 | 0 | V\$MAF_Q6_01    | MAF                                                | 23 | 0 | V\$CDX2_01     | Cdx-2                                           | 23 | 0 |
| V\$AP2GAMMA_01 | AP-2gamma             | 23 | 0 | V\$MAFB_01      | MAFB                                               | 23 | 0 | V\$CETS1P54_02 | c-Ets-1(p54)                                    | 23 | 0 |
| V\$AP4_01      | activator protein 4   | 23 | 0 | V\$MATH1_Q2     | E47:MATH1                                          | 23 | 0 | V\$DBX1_01     | Dbx-1                                           | 23 | 0 |
| V\$AR_Q6       | half-site matrix      | 23 | 0 | V\$MYOD_Q6      | myoblast determining factor                        | 23 | 0 | V\$DBX2_01     | Dbx-2                                           | 23 | 0 |
| V\$BACH1_01    | BTB and CNC homolog 1 | 23 | 0 | V\$MYOGENIN_Q6  | myogenin                                           | 23 | 0 | V\$DLX1_01     | Dlx-1                                           | 23 | 0 |
| V\$BACH2_01    | BTB and CNC homolog 2 | 23 | 0 | V\$NEUROD_01    | Neuro D                                            | 23 | 0 | V\$DLX3_01     | dlx3                                            | 23 | 0 |
| V\$BLIMP1_Q6   | BLIMP1                | 23 | 0 | V\$NFE2_01      | NF-E2 p45                                          | 23 | 0 | V\$DLX7_01     | Dlx7                                            | 23 | 0 |
| V\$CETS1P54_01 | c-Ets-1(p54)          | 23 | 0 | V\$NRF2_Q4      | heterodimer containing Nrf2                        | 23 | 0 | V\$E12_Q6      | E12                                             | 23 | 0 |
| V\$CKROX_Q2    | CKROX                 | 23 | 0 | V\$P53_02       | tumor suppressor p53                               | 23 | 0 | V\$E2F1_01     | E2F1                                            | 23 | 0 |
| V\$CMF2_02     | C-MAF                 | 23 | 0 | V\$P63_01       | p63                                                | 23 | 0 | V\$E2F6_01     | E2F6                                            | 23 | 0 |
| V\$CP2_01      | CP2                   | 23 | 0 | V\$PEA3_Q6      | PEA3                                               | 23 | 0 | V\$ELF1_Q5     | ELF1                                            | 23 | 0 |
| V\$E12_Q6      | E12                   | 23 | 0 | V\$PU1_Q6       | PU.1                                               | 23 | 0 | V\$EN1_02      | En-1                                            | 23 | 0 |
| V\$E2A_Q6      | E2A                   | 23 | 0 | V\$PUR1_Q4      | PUR1                                               | 23 | 0 | V\$EN2_01      | En-2                                            | 23 | 0 |
| V\$E2F1_01     | E2F1                  | 23 | 0 | V\$STAT6_02     | signal transducer and activator of transcription 6 | 23 | 0 | V\$ESX1_01     | Esx1                                            | 23 | 0 |
| V\$E2F6_01     | E2F6                  | 23 | 0 | V\$TCF11_01     | TCF11/KCR-F1/Nrf1 homodimers                       | 23 | 0 | V\$ETS2_Q6     | ETS2                                            | 23 | 0 |
| V\$E47_01      | E47                   | 23 | 0 | V\$TR4_01       | TR4                                                | 23 | 0 | V\$ETS_Q4      | Ets                                             | 23 | 0 |
| V\$EBF_Q6      | EBF                   | 23 | 0 | MA0055.1        | Myf                                                | 22 | 0 | V\$EVI1_04     | ectopic viral integration site 1 encoded factor | 23 | 0 |
| V\$ELF1_Q5     | ELF1                  | 23 | 0 | MA0103.1        | ZEB1                                               | 22 | 0 | V\$FPM315_01   | Zinc finger protein FPM315 with KRAB            | 23 | 0 |

|                     |                                                                |    |   |                    |                                                                                |    |   |                 |                  |    |   |
|---------------------|----------------------------------------------------------------|----|---|--------------------|--------------------------------------------------------------------------------|----|---|-----------------|------------------|----|---|
|                     |                                                                |    |   |                    |                                                                                |    |   |                 | and SCAN domains |    |   |
| V\$ER_Q6_02         | half-site matrix,<br>half-ERE                                  | 23 | 0 | MA0106.1           | TP53                                                                           | 22 | 0 | V\$GABPALPHA_Q4 | GABP-alpha       | 23 | 0 |
| V\$ESE1_Q3          | ESE1                                                           | 23 | 0 | V\$AREB6_01        | AREB6 (Atp1a1<br>regulatory element<br>binding factor 6)                       | 22 | 0 | V\$HB24_01      | HB24             | 23 | 0 |
| V\$ETS2_B           | c-Ets-2 binding<br>sites                                       | 23 | 0 | V\$EBOX_Q6_01      | Ebox                                                                           | 22 | 0 | V\$HDX_01       | Hdx              | 23 | 0 |
| V\$ETS_Q4           | Ets                                                            | 23 | 0 | V\$FLI1_Q6         | FLI1                                                                           | 22 | 0 | V\$HEB_Q6       | HEB              | 23 | 0 |
| V\$FLI1_Q6          | FLI1                                                           | 23 | 0 | V\$LMAF_Q2         | LMAF                                                                           | 22 | 0 | V\$HMBBOX1_01   | Hmbox1           | 23 | 0 |
| V\$FPM315_01        | Zinc finger protein<br>FPM315 with<br>KRAB and SCAN<br>domains | 23 | 0 | V\$LMO2COM_01      | complex of Lmo2<br>bound to Tal-1, E2A<br>proteins, and GATA-1,<br>half-site 1 | 22 | 0 | V\$HMGY_Q3      | HMGY             | 23 | 0 |
| V\$FRA1_Q5          | FRA1                                                           | 23 | 0 | V\$MAFA_Q4_01      | MAFA                                                                           | 22 | 0 | V\$HMX1_02      | HMX1             | 23 | 0 |
| V\$GABPALPH<br>A_Q4 | GABP-alpha                                                     | 23 | 0 | V\$NERF_Q2         | new ets-related factor<br>1a                                                   | 22 | 0 | V\$HMX3_02      | Nkx5-1           | 23 | 0 |
| V\$GR_Q6_01         | half-site matrix                                               | 23 | 0 | V\$SMAD3_Q6        | SMAD3                                                                          | 22 | 0 | V\$HNF1_Q6      | HNF1             | 23 | 0 |
| V\$HEB_Q6           | HEB                                                            | 23 | 0 | V\$T3R_Q6          | half-site matrix                                                               | 22 | 0 | V\$HNF1B_01     | HNF-1beta        | 23 | 0 |
| V\$IRF_Q6           | IRF                                                            | 23 | 0 | V\$TAL1_Q6         | TAL1                                                                           | 22 | 0 | V\$HOMEZ_01     | Homez            | 23 | 0 |
| V\$KAISO_01         | KAISO                                                          | 23 | 0 | V\$TEL2_Q6         | Tel-2                                                                          | 22 | 0 | V\$HOX13_02     | HOXA5            | 23 | 0 |
| V\$LBP1_Q6          | LBP-1                                                          | 23 | 0 | MA0081.1           | SPIB                                                                           | 21 | 0 | V\$HOXA10_01    | HOXA10           | 23 | 0 |
| V\$LMAF_Q2          | LMAF                                                           | 23 | 0 | V\$AP2GAMMA_0<br>1 | AP-2gamma                                                                      | 21 | 0 | V\$HOXA13_03    | HOXA13           | 23 | 0 |
| V\$LTF_Q6           | LTF                                                            | 23 | 0 | V\$ESE1_Q3         | ESE1                                                                           | 21 | 0 | V\$HOXA1_01     | HOXA1            | 23 | 0 |
| V\$MAFA_Q4_0<br>1   | MAFA                                                           | 23 | 0 | V\$NF1_Q6          | nuclear factor 1                                                               | 21 | 0 | V\$HOXA2_01     | HoxA2            | 23 | 0 |
| V\$MAFB_01          | MAFB                                                           | 23 | 0 | V\$STAT3_02        | signal transducer and<br>activator of<br>transcription 3                       | 21 | 0 | V\$HOXA4_01     | HOXA4            | 23 | 0 |
| V\$MATH1_Q2         | E47:MATH1                                                      | 23 | 0 | MA0003.1           | TFAP2A                                                                         | 20 | 0 | V\$HOXA6_01     | HOXA6            | 23 | 0 |
| V\$MAZ_Q6           | MAZ                                                            | 23 | 0 | V\$AP2ALPHA_01     | AP-2alpha                                                                      | 20 | 0 | V\$HOXA7_02     | HOXA7            | 23 | 0 |
| V\$MEIS2_02         | MEIS2                                                          | 23 | 0 | V\$CETS1P54_01     | c-Ets-1(p54)                                                                   | 20 | 0 | V\$HOXA9_01     | hoxa9            | 23 | 0 |

|                |                                                    |    |   |                 |                                                       |    |   |              |        |    |   |
|----------------|----------------------------------------------------|----|---|-----------------|-------------------------------------------------------|----|---|--------------|--------|----|---|
| V\$MYOD_01     | myoblast determination gene product                | 23 | 0 | V\$CP2_01       | CP2                                                   | 20 | 0 | V\$HOXB13_01 | HOXB13 | 23 | 0 |
| V\$MYOGENIN_Q6 | myogenin                                           | 23 | 0 | V\$DELTAEF1_01  | deltaEF1                                              | 20 | 0 | V\$HOXB4_01  | HOXB4  | 23 | 0 |
| V\$MZF1_Q5     | MZF1                                               | 23 | 0 | V\$E47_01       | E47                                                   | 20 | 0 | V\$HOXB5_01  | HoxB5  | 23 | 0 |
| V\$NERF_Q2     | new ets-related factor 1a                          | 23 | 0 | V\$FPM315_01    | Zinc finger protein FPM315 with KRAB and SCAN domains | 20 | 0 | V\$HOXB6_01  | HOXB6  | 23 | 0 |
| V\$NEUROD_01   | Neuro D                                            | 23 | 0 | V\$GR_Q6_01     | half-site matrix                                      | 20 | 0 | V\$HOXB7_01  | HOXB7  | 23 | 0 |
| V\$NF1_Q6      | nuclear factor 1                                   | 23 | 0 | V\$MEIS2_02     | MEIS2                                                 | 20 | 0 | V\$HOXB8_01  | HOXB8  | 23 | 0 |
| V\$NFAT1_Q6    | NFAT1                                              | 23 | 0 | V\$SMAD4_Q6     | SMAD4                                                 | 20 | 0 | V\$HOXB9_01  | HOXB9  | 23 | 0 |
| V\$NFAT2_Q5    | NF-AT2                                             | 23 | 0 | V\$TCF4_Q3      | Tcf-4 dimer                                           | 20 | 0 | V\$HOXC13_01 | HOXC13 | 23 | 0 |
| V\$NFE2_01     | NF-E2 p45                                          | 23 | 0 | MA0002.2        | RUNX1                                                 | 19 | 0 | V\$HOXC4_01  | HOXC4  | 23 | 0 |
| V\$NRF2_Q4     | heterodimer containing Nrf2                        | 23 | 0 | MA0039.2        | Klf4                                                  | 19 | 0 | V\$HOXC5_01  | HOXC5  | 23 | 0 |
| V\$PAX4_Q3     | Pax-4 binding sites                                | 23 | 0 | MA0067.1        | Pax2                                                  | 19 | 0 | V\$HOXC6_01  | HOXC6  | 23 | 0 |
| V\$PEA3_Q6     | PEA3                                               | 23 | 0 | MA0117.1        | Mafk                                                  | 19 | 0 | V\$HOXC8_01  | HOXC-8 | 23 | 0 |
| V\$PU1_Q4      | PU.1                                               | 23 | 0 | MA0148.1        | FOXA1                                                 | 19 | 0 | V\$HOXC9_01  | HOXC9  | 23 | 0 |
| V\$SMAD3_Q6    | SMAD3                                              | 23 | 0 | MA0161.1        | NFIC                                                  | 19 | 0 | V\$HOXD10_01 | HOXD10 | 23 | 0 |
| V\$SMAD4_Q6    | SMAD4                                              | 23 | 0 | V\$HNF4_Q6_Q3   | half-site 2                                           | 19 | 0 | V\$HOXD13_01 | HOXD13 | 23 | 0 |
| V\$SOX9_Q4     | SOX9                                               | 23 | 0 | V\$LTF_Q6       | LTF                                                   | 19 | 0 | V\$HOXD1_01  | HOXD1  | 23 | 0 |
| V\$SP4_Q5      | SP4                                                | 23 | 0 | V\$MEIS1_01     | Meis-1 (myeloid ecotropic viral integration site 1)   | 19 | 0 | V\$HOXD3_01  | HOXD3  | 23 | 0 |
| V\$STAT1_Q3    | signal transducer and activator of transcription 1 | 23 | 0 | V\$TCF11MAFG_Q1 | TCF11:MafG heterodimers                               | 19 | 0 | V\$HOXD8_01  | HOXD8  | 23 | 0 |
| V\$STAT4_Q1    | signal transducer and activator of transcription 4 | 23 | 0 | V\$USF_Q6_Q1    | USF                                                   | 19 | 0 | V\$IPF1_Q6   | ipf1   | 23 | 0 |
| V\$T3R_Q6      | half-site matrix                                   | 23 | 0 | MA0144.1        | Stat3                                                 | 18 | 0 | V\$IRF3_Q3   | IRF3   | 23 | 0 |
| V\$TAL1_Q1     | Tal-1 (Scf)                                        | 23 | 0 | V\$USF2_Q6      | USF2                                                  | 18 | 0 | V\$ISL2_Q1   | Isl2   | 23 | 0 |

|                                  |                                                          |    |   |                              |                                        |    |   |              |                            |    |   |
|----------------------------------|----------------------------------------------------------|----|---|------------------------------|----------------------------------------|----|---|--------------|----------------------------|----|---|
| V\$TEF_01                        | TEF b.s.                                                 | 23 | 0 | MA0092.1                     | Hand1::Tcfe2a                          | 17 | 0 | V\$K2B_01    | K-2b                       | 23 | 0 |
| V\$TEL2_Q6                       | Tel-2                                                    | 23 | 0 | F\$AMT1_Q2                   | AMT1                                   | 17 | 0 | V\$LBP1_Q6   | LBP-1                      | 23 | 0 |
| V\$TR4_01                        | TR4                                                      | 23 | 0 | MA0090.1                     | TEAD1                                  | 16 | 0 | V\$LBX2_01   | Lbx2                       | 23 | 0 |
| V\$USF_Q6_01                     | USF                                                      | 23 | 0 | V\$HNF3A_01                  | FOXA1                                  | 16 | 0 | V\$LH2_01    | LH-2                       | 23 | 0 |
| V\$WT1_Q6                        | WT1                                                      | 23 | 0 | V\$MAZ_Q6                    | MAZ                                    | 16 | 0 | V\$LHX3_02   | Lhx3                       | 23 | 0 |
| V\$ZBED6_01                      | ZBED6                                                    | 23 | 0 | V\$SOX9_Q4                   | SOX9                                   | 16 | 0 | V\$LHX5_01   | Lhx5                       | 23 | 0 |
| MA0047.2                         | Foxa2                                                    | 22 | 0 | V\$TEF1_Q6                   | TEF-1                                  | 16 | 0 | V\$LHX61_01  | lhx6.1                     | 23 | 0 |
| MA0048.1                         | NHLH1                                                    | 22 | 0 | V\$TEF_01                    | TEF b.s.                               | 16 | 0 | V\$LHX9_01   | Lhx9                       | 23 | 0 |
| MA0092.1                         | Hand1::Tcfe2a                                            | 22 | 0 | V\$TGIF_01                   | TGIF (5'TG3'<br>interacting factor)    | 16 | 0 | V\$LIM1_01   | Lim-1                      | 23 | 0 |
| MA0138.2                         | REST                                                     | 22 | 0 | MA0047.2                     | Foxa2                                  | 15 | 0 | V\$LMX1_01   | Lmx-1                      | 23 | 0 |
| V\$AREB6_04                      | AREB6 (Atp1a1<br>regulatory element<br>binding factor 6) | 22 | 0 | V\$AP2REP_01                 | AP-2 repressor                         | 15 | 0 | V\$LMX1B_01  | lmx1b                      | 23 | 0 |
| V\$BEN_01                        | BEN                                                      | 22 | 0 | V\$CACBINDINGP<br>ROTEIN_Q6  | CAC-binding protein                    | 15 | 0 | V\$MATH1_Q2  | E47:MATH1                  | 23 | 0 |
| V\$CACCCBIND<br>INGFACTOR_Q<br>6 | CACCC-binding<br>factor                                  | 22 | 0 | V\$CEBPB_01                  | CCAAT/enhancer<br>binding protein beta | 15 | 0 | V\$MMEF2_Q6  | myocyte enhancer<br>factor | 23 | 0 |
| V\$DR1_Q3                        | Direct repeat 1                                          | 22 | 0 | V\$LBP9_01                   | LBP9 (Tcfcp211)                        | 15 | 0 | V\$MSX1_02   | Msx-1                      | 23 | 0 |
| V\$EAR2_Q2                       | EAR2                                                     | 22 | 0 | V\$SMAD_Q6_01                | SMAD                                   | 15 | 0 | V\$MSX2_01   | Msx-2                      | 23 | 0 |
| V\$EBOX_Q6_0<br>1                | Ebox                                                     | 22 | 0 | V\$TTF1_Q6                   | TTF-1 (Nkx2-1)                         | 15 | 1 | V\$MSX3_01   | Msx-3                      | 23 | 0 |
| V\$ELK1_01                       | Elk-1                                                    | 22 | 0 | V\$CACCCBINDIN<br>GFACTOR_Q6 | CACCC-binding factor                   | 13 | 0 | V\$NANOG_02  | Nanog                      | 23 | 0 |
| V\$HNF1_Q6_0<br>1                | HNF1                                                     | 22 | 0 | V\$CEBP_Q2_01                | C/EBP                                  | 13 | 0 | V\$NCX_02    | Ncx                        | 23 | 0 |
| V\$HNF3_Q6_0<br>1                | HNF3                                                     | 22 | 0 | V\$SP1_Q4_01                 | Sp1                                    | 13 | 0 | V\$NEUROD_02 | NeuroD                     | 23 | 0 |
| V\$HNF4_Q6_0<br>3                | half-site 2                                              | 22 | 0 | V\$TBX5_02                   | TBX5                                   | 13 | 0 | V\$NFAT1_Q6  | NFAT1                      | 23 | 0 |
| V\$IRF3_Q3                       | IRF3                                                     | 22 | 0 | V\$TFII_Q6                   | TFII-I                                 | 13 | 0 | V\$NFE2_01   | NF-E2 p45                  | 23 | 0 |
| V\$LFA1_Q6                       | LF-A1                                                    | 22 | 0 | MA0154.1                     | EBF1                                   | 12 | 0 | V\$NKX12_01  | Nkx1-2                     | 23 | 0 |

|               |                                                                       |    |   |                          |                                   |    |   |               |                                |    |   |
|---------------|-----------------------------------------------------------------------|----|---|--------------------------|-----------------------------------|----|---|---------------|--------------------------------|----|---|
| V\$LMO2COM_01 | complex of Lmo2 bound to Tal-1, E2A proteins, and GATA-1, half-site 1 | 22 | 0 | V\$CKROX_Q2              | CKROX                             | 12 | 0 | V\$NKX22_02   | NKX22                          | 23 | 0 |
| V\$MAF_Q6_01  | MAF                                                                   | 22 | 0 | V\$EBF_Q6                | EBF                               | 12 | 0 | V\$NKX52_01   | Nkx5-2                         | 23 | 0 |
| V\$MEIS1_01   | Meis-1 (myeloid ecotropic viral integration site 1)                   | 22 | 0 | V\$GKLF_02               | GKLF (KLF4)                       | 12 | 0 | V\$NKX61_02   | NKX6.1                         | 23 | 0 |
| V\$NFAT_Q4_01 | NF-AT                                                                 | 22 | 0 | V\$KAISO_01              | KAISO                             | 12 | 0 | V\$NKX62_Q2   | NK related homeobox factor 6-2 | 23 | 0 |
| V\$NRSF_01    | neuron-restrictive silencer factor                                    | 22 | 0 | V\$PAX4_03               | Pax-4 binding sites               | 12 | 0 | V\$NKX63_01   | Nkx6-3                         | 23 | 0 |
| V\$P53_02     | tumor suppressor p53                                                  | 22 | 0 | V\$PPARG_Q6              | half-site                         | 12 | 0 | V\$OBOX5_01   | Obox5                          | 23 | 0 |
| V\$PPARG_Q6   | half-site                                                             | 22 | 0 | MA0048.1                 | NHLH1                             | 11 | 0 | V\$OCT1_08    | 1-Oct                          | 23 | 0 |
| V\$STAT5A_04  | signal transducer and activator of transcription 5a                   | 22 | 0 | V\$COREBINDING_FACTOR_Q6 | core-binding factor               | 11 | 0 | V\$OCTAMER_01 | Octamer                        | 23 | 0 |
| V\$STAT6_01   | signal transducer and activator of transcription 6                    | 22 | 0 | V\$ER_Q6_02              | half-site matrix, half-ERE        | 11 | 0 | V\$OTP_01     | OTP                            | 23 | 0 |
| V\$TFII_Q6    | TFII-I                                                                | 22 | 0 | V\$SREBP2_Q6             | SREBP2                            | 11 | 0 | V\$OTX1_01    | Otx1                           | 23 | 0 |
| MA0117.1      | Mafb                                                                  | 21 | 0 | V\$TFE_Q6                | TFE                               | 11 | 0 | V\$OTX2_01    | Otx2                           | 23 | 0 |
| F\$AMT1_Q2    | AMT1                                                                  | 21 | 0 | V\$ATF4_Q2               | activating transcription factor 4 | 10 | 0 | V\$OTX3_01    | Otx3                           | 23 | 0 |
| V\$BRN4_01    | Brn-4                                                                 | 21 | 0 | V\$CACD_01               | CACD                              | 10 | 0 | V\$PAX6_02    | pax6                           | 23 | 0 |
| V\$CACD_01    | CACD                                                                  | 21 | 0 | V\$EHF_01                | EHF                               | 10 | 0 | V\$PAX7_01    | Pax-7                          | 23 | 0 |
| V\$FOXO4_01   | fork head box O4                                                      | 21 | 0 | V\$MZF1_Q5               | MZF1                              | 10 | 0 | V\$PEA3_Q6    | PEA3                           | 23 | 0 |
| V\$HNF3A_01   | FOXA1                                                                 | 21 | 0 | V\$PKNOX2_01             | PKNOX2                            | 10 | 0 | V\$PIT1_01    | Pit-1                          | 23 | 0 |
| V\$HNF3B_01   | Hepatocyte Nuclear Factor 3beta                                       | 21 | 0 | V\$ZBED6_01              | ZBED6                             | 10 | 0 | V\$PITX1_01   | Pitx1                          | 23 | 0 |
| V\$LHX3_02    | Lhx3                                                                  | 21 | 0 | MA0137.2                 | STAT1                             | 9  | 0 | V\$PITX2_01   | PITX2                          | 23 | 0 |
| V\$LMX1B_01   | lmx1b                                                                 | 21 | 0 | V\$MRG2_01               | MRG2                              | 9  | 0 | V\$PMX2A_01   | PMX2A                          | 23 | 0 |
| V\$NANOG_02   | Nanog                                                                 | 21 | 0 | V\$PREP1_01              | PREP1                             | 9  | 0 | V\$PMX2B_01   | PMX2B                          | 23 | 0 |

|                 |                                     |    |   |                 |                                                                              |   |   |               |                                                     |    |   |
|-----------------|-------------------------------------|----|---|-----------------|------------------------------------------------------------------------------|---|---|---------------|-----------------------------------------------------|----|---|
| V\$NCX_02       | Ncx                                 | 21 | 0 | V\$RORBETA_Q2   | RORBETA                                                                      | 9 | 0 | V\$PROP1_02   | Prop-1                                              | 23 | 0 |
| V\$NFAT3_Q3     | NFAT3                               | 21 | 0 | V\$AML_Q6       | AML                                                                          | 8 | 0 | V\$PSX1_01    | PSX1                                                | 23 | 0 |
| V\$P63_01       | p63                                 | 21 | 0 | V\$NKX25_Q5     | Nkx2-5                                                                       | 8 | 0 | V\$PU1_Q6     | PU.1                                                | 23 | 0 |
| V\$PIT1_01      | Pit-1                               | 21 | 0 | V\$TITF1_Q3     | TTF-1, TITF1 (thyroid transcription factor 1)                                | 8 | 0 | V\$RHOX11_01  | Rhox11                                              | 23 | 0 |
| V\$PKNOX2_01    | PKNOX2                              | 21 | 0 | MA0060.1        | NFYA                                                                         | 7 | 0 | V\$S8_02      | S8                                                  | 23 | 0 |
| V\$PTF1BETA_Q6  | PTF1-beta                           | 21 | 0 | MA0119.1        | TLX1::NFIC                                                                   | 7 | 0 | V\$SHOX2_01   | Shox2                                               | 23 | 0 |
| V\$TGIF_01      | TGIF (5'TG3' interacting factor)    | 21 | 0 | MA0442.1        | SOX10                                                                        | 7 | 0 | V\$STAT1_03   | signal transducer and activator of transcription 1  | 23 | 0 |
| V\$TST1_02      | 6-Oct                               | 21 | 0 | V\$ALPHACP1_01  | alpha-CP1                                                                    | 7 | 0 | V\$STAT3_02   | signal transducer and activator of transcription 3  | 23 | 0 |
| V\$UF1H3BETA_Q6 | UF1H3BETA                           | 21 | 0 | V\$BLIMP1_Q6    | BLIMP1                                                                       | 7 | 0 | V\$STAT5A_04  | signal transducer and activator of transcription 5a | 23 | 0 |
| V\$ZFP281_01    | Zfp281                              | 21 | 0 | V\$CREB_Q3      | CREB                                                                         | 7 | 0 | V\$STAT6_01   | signal transducer and activator of transcription 6  | 23 | 0 |
| V\$AP2REP_01    | AP-2 repressor                      | 20 | 0 | V\$CTF1_01      | selection of the binding sites for CTCF by HOX11 cooperative DNA binding [2] | 7 | 0 | V\$TGIF_02    | TGIF1                                               | 23 | 0 |
| V\$CEBPB_01     | CCAAT/enhancer binding protein beta | 20 | 0 | V\$ELK1_01      | Elk-1                                                                        | 7 | 0 | V\$TR4_01     | TR4                                                 | 23 | 0 |
| V\$DBX1_01      | Dbx-1                               | 20 | 0 | V\$HNF3ALPHA_Q6 | HNF3alpha                                                                    | 7 | 0 | V\$TST1_02    | 6-Oct                                               | 23 | 0 |
| V\$FOXO1_01     | fork head box O1                    | 20 | 0 | V\$MYC_Q2       | Myc                                                                          | 7 | 0 | V\$UNCX4.1_01 | Uncx-4.1                                            | 23 | 0 |
| V\$GKLF_02      | GKLF (KLF4)                         | 20 | 0 | V\$NFY_01       | nuclear factor Y (Y-box binding factor)                                      | 7 | 0 | V\$VAX1_01    | Vax-1                                               | 23 | 0 |
| V\$HOXD8_01     | HOXD8                               | 20 | 0 | V\$SMAD1_01     | SMAD1                                                                        | 7 | 0 | V\$VSX1_01    | Vsx1                                                | 23 | 0 |
| V\$LHX5_01      | Lhx5                                | 20 | 0 | V\$STAT5A_04    | signal transducer and activator of transcription 5a                          | 7 | 0 | MA0003.1      | TFAP2A                                              | 22 | 0 |
| V\$LIM1_01      | Lim-1                               | 20 | 0 | V\$TGIF2_01     | TGIF2                                                                        | 7 | 0 | MA0056.1      | MZF1_1-4                                            | 22 | 0 |

|                         |                              |    |   |               |                                      |   |   |                |                       |    |   |
|-------------------------|------------------------------|----|---|---------------|--------------------------------------|---|---|----------------|-----------------------|----|---|
| V\$LMX1_01              | Lmx-1                        | 20 | 0 | MA0093.1      | USF1                                 | 6 | 0 | MA0079.2       | SP1                   | 22 | 0 |
| V\$NFKB_Q6_01           | NF-kappaB                    | 20 | 0 | MA0164.1      | Nr2e3                                | 6 | 0 | MA0081.1       | SPIB                  | 22 | 0 |
| V\$STAT_Q6              | STAT                         | 20 | 0 | V\$HNF3_Q6_01 | HNF3                                 | 6 | 0 | MA0151.1       | ARID3A                | 22 | 0 |
| V\$TCF11_01             | TCF11/KCR-F1/Nrf1 homodimers | 20 | 0 | V\$NFAT2_Q5   | NF-AT2                               | 6 | 0 | MA0156.1       | FEV                   | 22 | 0 |
| V\$TCF11MAFG_01         | TCF11:MafG heterodimers      | 20 | 0 | V\$P300_01    | p300                                 | 6 | 0 | V\$AP2ALPHA_01 | AP-2alpha             | 22 | 0 |
| MA0065.2                | PPARG::RXRA                  | 19 | 0 | V\$CEBPE_01   | cebpe                                | 5 | 0 | V\$AP2GAMMA_01 | AP-2gamma             | 22 | 0 |
| MA0067.1                | Pax2                         | 19 | 0 | V\$CTCF_02    | CCCTC-binding factor                 | 5 | 0 | V\$AP4_01      | activator protein 4   | 22 | 0 |
| V\$ALPHACP1_01          | alpha-CP1                    | 19 | 0 | V\$E2F1_01    | E2F1                                 | 5 | 0 | V\$AR_Q6       | half-site matrix      | 22 | 0 |
| V\$COREBIND1NGFACTOR_Q6 | core-binding factor          | 19 | 0 | V\$E2F6_01    | E2F6                                 | 5 | 0 | V\$BACH2_01    | BTB and CNC homolog 2 | 22 | 0 |
| V\$HMX3_02              | Nkx5-1                       | 19 | 0 | V\$PR_Q2      | half-site matrix                     | 5 | 0 | V\$CHCH_01     | Churchill             | 22 | 0 |
| V\$ICSBP_Q6             | ICSBP                        | 19 | 0 | V\$SREBP1_Q5  | SREBP1                               | 5 | 0 | V\$CKROX_Q2    | CKROX                 | 22 | 0 |
| V\$NKX52_01             | Nkx5-2                       | 19 | 0 | V\$NKX32_01   | Nkx3-2                               | 5 | 1 | V\$DLX2_01     | Dlx-2                 | 22 | 0 |
| V\$NKX63_01             | Nkx6-3                       | 19 | 0 | MA0031.1      | FOXD1                                | 4 | 0 | V\$DOBOX4_01   | Dobox4                | 22 | 0 |
| V\$OCT1_08              | 1-Oct                        | 19 | 0 | MA0056.1      | MZF1_1-4                             | 4 | 0 | V\$DOBOX5_01   | Dobox5                | 22 | 0 |
| V\$P50RELAP65_Q5_01     | P50:RELA-P65                 | 19 | 0 | MA0112.2      | ESR1                                 | 4 | 0 | V\$E47_01      | E47                   | 22 | 0 |
| V\$PAX6_02              | pax6                         | 19 | 0 | V\$CEBPA_01   | CCAAT/enhancer binding protein alpha | 4 | 0 | V\$EGR_Q6      | Egr                   | 22 | 0 |
| V\$PREP1_01             | PREP1                        | 19 | 0 | V\$DR1_Q3     | Direct repeat 1                      | 4 | 0 | V\$ELK1_01     | Elk-1                 | 22 | 0 |
| V\$TEF1_Q6              | TEF-1                        | 19 | 0 | V\$EAR2_Q2    | EAR2                                 | 4 | 0 | V\$EMX2_01     | EMX2                  | 22 | 0 |
| MA0103.1                | ZEB1                         | 19 | 1 | V\$GADP_01    | Growth-associated binding protein    | 4 | 0 | V\$ESE1_Q3     | ESE1                  | 22 | 0 |
| V\$SREBP2_Q6            | SREBP2                       | 19 | 1 | V\$NANOG_02   | Nanog                                | 4 | 0 | V\$EVX1_01     | Evx-1                 | 22 | 0 |
| V\$TCF4_03              | Tcf-4 dimer                  | 19 | 1 | V\$TFEB_01    | TFEB                                 | 4 | 0 | V\$FAC1_01     | fetal Alz-50 clone 1  | 22 | 0 |
| MA0119.1                | TLX1::NFIC                   | 18 | 0 | MA0004.1      | Arnt                                 | 3 | 0 | V\$FLI1_Q6     | FLI1                  | 22 | 0 |
| V\$BRN3C_01             | Brn-3c                       | 18 | 0 | MA0157.1      | FOXO3                                | 3 | 0 | V\$FRA1_Q5     | FRA1                  | 22 | 0 |



|                 |                                                                              |    |   |                 |                                                    |   |   |              |        |    |   |
|-----------------|------------------------------------------------------------------------------|----|---|-----------------|----------------------------------------------------|---|---|--------------|--------|----|---|
| V\$CEBP_Q2_01   | C/EBP                                                                        | 18 | 0 | MA0258.1        | ESR2                                               | 3 | 0 | V\$GBX1_01   | Gbx1   | 22 | 0 |
| V\$CTF1_01      | selection of the binding sites for CTCF by HOX11 cooperative DNA binding [2] | 18 | 0 | V\$AP2_Q6_01    | AP-2                                               | 3 | 0 | V\$GBX2_01   | Gbx2   | 22 | 0 |
| V\$DBX2_01      | Dbx-2                                                                        | 18 | 0 | V\$ATF3_Q6      | activating transcription factor 3                  | 3 | 0 | V\$GSC_01    | Gsc    | 22 | 0 |
| V\$EHF_01       | EHF                                                                          | 18 | 0 | V\$ATF5_01      | ATF5 binding site                                  | 3 | 0 | V\$GSH2_01   | GSH2   | 22 | 0 |
| V\$FOXP3_Q4     | FOXP3                                                                        | 18 | 0 | V\$CLOCKBMAL_Q6 | CLOCK:BMAL                                         | 3 | 0 | V\$HOXA11_01 | HOXA11 | 22 | 0 |
| V\$GADP_01      | Growth-associated binding protein                                            | 18 | 0 | V\$CMYC_02      | c-Myc heterodimer (with a 26-29 kDa factor)        | 3 | 0 | V\$HOXA3_02  | HOXA3  | 22 | 0 |
| V\$HDX_01       | Hdx                                                                          | 18 | 0 | V\$FOXP3_Q4     | FOXP3                                              | 3 | 0 | V\$HOXB3_01  | HOXB3  | 22 | 0 |
| V\$HNF3ALPHA_Q6 | HNF3alpha                                                                    | 18 | 0 | V\$NGFIC_01     | nerve growth factor-induced protein C              | 3 | 0 | V\$HOXC10_01 | HOXC10 | 22 | 0 |
| V\$NKX61_03     | NKX6.1                                                                       | 18 | 0 | V\$NRSF_01      | neuron-restrictive silencer factor                 | 3 | 0 | V\$HOXC11_01 | HOXC11 | 22 | 0 |
| V\$NRSE_B       | neural-restrictive-silencer-element                                          | 18 | 0 | V\$PAX8_B       | Pax-8 binding sites                                | 3 | 0 | V\$HOXC12_01 | HOXC12 | 22 | 0 |
| V\$SMAD_Q6      | SMAD                                                                         | 18 | 0 | V\$PAX_Q6       | Pax                                                | 3 | 0 | V\$HOXD11_01 | HOXD11 | 22 | 0 |
| V\$SP3_Q3       | Sp3                                                                          | 18 | 0 | V\$PEBP_Q6      | PEBP                                               | 3 | 0 | V\$HOXD12_01 | HOXD12 | 22 | 0 |
| V\$TGIF2_01     | TGIF2                                                                        | 18 | 0 | V\$SP3_Q3       | Sp3                                                | 3 | 0 | V\$IRF_Q6    | IRF    | 22 | 0 |
| V\$USF2_Q6      | USF2                                                                         | 18 | 1 | V\$SP4_Q5       | SP4                                                | 3 | 0 | V\$IRX2_01   | Irx2   | 22 | 0 |
| MA0060.1        | NFYA                                                                         | 17 | 0 | V\$SREBP_Q6     | SREBP                                              | 3 | 0 | V\$IRX3_01   | Irx-3  | 22 | 0 |
| V\$BARHL2_01    | Barhl2                                                                       | 17 | 0 | V\$STAT4_01     | signal transducer and activator of transcription 4 | 3 | 0 | V\$IRX4_01   | IRX4   | 22 | 0 |
| V\$CEBPA_01     | CCAAT/enhancer binding protein alpha                                         | 17 | 0 | V\$STAT_01      | signal transducers and activators of transcription | 3 | 0 | V\$IRX5_01   | Irx5   | 22 | 0 |
| V\$EV11_04      | ectopic viral integration site 1 encoded factor                              | 17 | 0 | V\$ZFP281_01    | Zfp281                                             | 3 | 0 | V\$IRXB3_01  | IRXB3  | 22 | 0 |
| V\$GAF_Q6       | GAF                                                                          | 17 | 0 | V\$CEBPDELTA_Q6 | C/EBPdelta                                         | 3 | 1 | V\$LHX4_01   | Lhx4   | 22 | 0 |

|                          |                                                                                   |    |   |                |                                                  |   |   |                |          |    |   |
|--------------------------|-----------------------------------------------------------------------------------|----|---|----------------|--------------------------------------------------|---|---|----------------|----------|----|---|
| V\$HOXC6_01              | HOXC6                                                                             | 17 | 0 | MA0058.1       | MAX                                              | 2 | 0 | V\$LMAF_Q2     | LMAF     | 22 | 0 |
| V\$RBPJK_Q4              | RBP-Jkappa                                                                        | 17 | 0 | MA0062.2       | GABPA                                            | 2 | 0 | V\$MAZ_Q6      | MAZ      | 22 | 0 |
| V\$SMAD1_01              | SMAD1                                                                             | 17 | 0 | V\$AML1_Q4     | AML1                                             | 2 | 0 | V\$MEF2_Q6_01  | MEF-2    | 22 | 0 |
| V\$VDR_Q3                | vitamin D receptor; mediates vitamin D3-signaling, often dimerizes with RXR-alpha | 17 | 0 | V\$BEN_01      | BEN                                              | 2 | 0 | V\$MOX1_01     | Mox1     | 22 | 0 |
| V\$MRG2_01               | MRG2                                                                              | 17 | 1 | V\$CREBP1_01   | cAMP-responsive element binding protein 1        | 2 | 0 | V\$MYOGENIN_Q6 | myogenin | 22 | 0 |
| V\$CACBINDIN GPROTEIN_Q6 | CAC-binding protein                                                               | 17 | 2 | V\$DBP_Q6      | DBP                                              | 2 | 0 | V\$NFAT2_Q5    | NF-AT2   | 22 | 0 |
| MA0106.1                 | TP53                                                                              | 16 | 0 | V\$EGR2_01     | Egr-2/Krox-20 early growth response gene product | 2 | 0 | V\$NFAT3_Q3    | NFAT3    | 22 | 0 |
| V\$AMEF2_Q6              | myocyte enhancer factor                                                           | 16 | 0 | V\$EGR3_01     | early growth response gene 3 product             | 2 | 0 | V\$NFAT_Q4_01  | NF-AT    | 22 | 0 |
| V\$ATF5_01               | ATF5 binding site                                                                 | 16 | 0 | V\$FOXJ3_01    | foxj3                                            | 2 | 0 | V\$NKX23_01    | Nkx2-3   | 22 | 0 |
| V\$NFY_01                | nuclear factor Y (Y-box binding factor)                                           | 16 | 0 | V\$FREAC4_01   | Fork head RElated ACTivator-4                    | 2 | 0 | V\$NKX29_01    | Nkx2-9   | 22 | 0 |
| V\$SIX4_01               | six4                                                                              | 16 | 0 | V\$GFI1B_01    | Gfi1b                                            | 2 | 0 | V\$NKX32_02    | Nkx3-2   | 22 | 0 |
| V\$STAT1STAT1_Q3         | STAT1:STAT1                                                                       | 16 | 0 | V\$GLI3_01     | GLI3                                             | 2 | 0 | V\$NKX3A_02    | Nkx3A    | 22 | 0 |
| V\$TTF1_Q6               | TTF-1 (Nkx2-1)                                                                    | 16 | 1 | V\$HEN1_02     | HEN1                                             | 2 | 0 | V\$OBOX2_01    | Obox2    | 22 | 0 |
| MA0068.1                 | Pax4                                                                              | 15 | 0 | V\$HLF_01      | hepatic leukemia factor                          | 2 | 0 | V\$OBOX3_01    | Obox3    | 22 | 0 |
| MA0107.1                 | RELA                                                                              | 15 | 0 | V\$KLF15_Q2    | KLF15                                            | 2 | 0 | V\$OCT2_01     | 2-Oct    | 22 | 0 |
| V\$AML_Q6                | AML                                                                               | 15 | 0 | V\$LEF1TCF1_Q4 | LEF1, TCF1                                       | 2 | 0 | V\$OG2_02      | OG-2     | 22 | 0 |
| V\$HOXA10_01             | HOXA10                                                                            | 15 | 0 | V\$LFA1_Q6     | LF-A1                                            | 2 | 0 | V\$PARP_Q3     | PARP     | 22 | 0 |
| V\$HOXD10_01             | HOXD10                                                                            | 15 | 0 | V\$MYCMAX_01   | c-Myc:Max heterodimer                            | 2 | 0 | V\$PBX1_01     | Pbx-1    | 22 | 0 |
| V\$LBP9_01               | LBP9 (Tcfcp211)                                                                   | 15 | 0 | V\$NFAT1_Q6    | NFAT1                                            | 2 | 0 | V\$POU2F3_01   | POU2F3   | 22 | 0 |
| V\$MMEF2_Q6              | myocyte enhancer                                                                  | 15 | 0 | V\$OLF1_01     | olfactory neuron-                                | 2 | 0 | V\$POU6F1_03   | POU6F1   | 22 | 0 |

|                   | factor                            |    |   |               | specific factor                   |   |   |              |                                                    |    |   |
|-------------------|-----------------------------------|----|---|---------------|-----------------------------------|---|---|--------------|----------------------------------------------------|----|---|
| V\$MSX3_01        | Msx-3                             | 15 | 0 | V\$REX1_03    | REX1                              | 2 | 0 | V\$RAX_01    | rax                                                | 22 | 0 |
| V\$PARP_Q3        | PARP                              | 15 | 0 | V\$SF1_Q6     | SF1                               | 2 | 0 | V\$SATB1_Q3  | SATB1                                              | 22 | 0 |
| V\$PUR1_Q4        | PUR1                              | 15 | 6 | V\$SOX_01     | SOX                               | 2 | 0 | V\$SP4_Q5    | SP4                                                | 22 | 0 |
| MA0152.1          | NFATC2                            | 14 | 0 | V\$TAXCREB_02 | Tax/CREB complex                  | 2 | 0 | V\$STAT4_01  | signal transducer and activator of transcription 4 | 22 | 0 |
| V\$ALX3_01        | ALX-3                             | 14 | 0 | V\$TBR2_01    | TBR2                              | 2 | 0 | V\$TAL1_01   | Tal-1 (Scf)                                        | 22 | 0 |
| V\$ATF3_Q6        | activating transcription factor 3 | 14 | 0 | V\$WT1_Q6     | WT1                               | 2 | 0 | V\$TGIF2_01  | TGIF2                                              | 22 | 0 |
| V\$ATF4_Q2        | activating transcription factor 4 | 14 | 0 | MA0025.1      | NFIL3                             | 1 | 0 | V\$VAX2_01   | Vax-2                                              | 22 | 0 |
| V\$BARX1_01       | Barx1                             | 14 | 0 | MA0035.2      | Gata1                             | 1 | 0 | V\$WT1_Q6    | WT1                                                | 22 | 0 |
| V\$BARX2_01       | Barx-2                            | 14 | 0 | MA0059.1      | MYC::MAX                          | 1 | 0 | MA0084.1     | SRY                                                | 21 | 0 |
| V\$FOXO3_01       | fork head box O3                  | 14 | 0 | MA0065.2      | PPARG::RXRA                       | 1 | 0 | MA0136.1     | ELF5                                               | 21 | 0 |
| V\$FOXO3A_Q1      | FOXO3A                            | 14 | 0 | MA0074.1      | RXRA::VDR                         | 1 | 0 | MA0154.1     | EBF1                                               | 21 | 0 |
| V\$GABP_B         | GA binding protein                | 14 | 0 | MA0083.1      | SRF                               | 1 | 0 | V\$AP1FJ_Q2  | activator protein 1                                | 21 | 0 |
| V\$HEN1_02        | HEN1                              | 14 | 0 | MA0104.2      | Mycn                              | 1 | 0 | V\$AREB6_04  | AREB6 (Atp1a1 regulatory element binding factor 6) | 21 | 0 |
| V\$KLF15_Q2       | KLF15                             | 14 | 0 | MA0113.1      | NR3C1                             | 1 | 0 | V\$BACH1_01  | BTB and CNC homolog 1                              | 21 | 0 |
| V\$NFKAPPAB6_5_01 | NF-kappaB (p65)                   | 14 | 0 | MA0133.1      | BRCA1                             | 1 | 0 | V\$CEBPA_01  | CCAAT/enhancer binding protein alpha               | 21 | 0 |
| V\$OCTAMER_02     | Octamer                           | 14 | 0 | MA0138.2      | REST                              | 1 | 0 | V\$DLX5_01   | dlx5                                               | 21 | 0 |
| V\$PAX8_B         | Pax-8 binding sites               | 14 | 0 | MA0147.1      | Myc                               | 1 | 0 | V\$DRI1_01   | DRI1 b.s.                                          | 21 | 0 |
| V\$PEBP_Q6        | PEBP                              | 14 | 0 | MA0152.1      | NFATC2                            | 1 | 0 | V\$DUXL_01   | Duxl                                               | 21 | 0 |
| V\$P300_01        | p300                              | 14 | 1 | V\$AML2_01    | AML2                              | 1 | 0 | V\$ETF_Q6    | ETF                                                | 21 | 0 |
| MA0112.2          | ESR1                              | 13 | 0 | V\$ATF6_01    | activating transcription factor 6 | 1 | 0 | V\$FOXO3A_Q1 | FOXO3A                                             | 21 | 0 |

|                |                                        |    |   |                   |                                                   |   |   |               |                                                                       |    |   |
|----------------|----------------------------------------|----|---|-------------------|---------------------------------------------------|---|---|---------------|-----------------------------------------------------------------------|----|---|
| V\$HAND1E47_01 | Hand1:E47 heterodimer                  | 13 | 0 | V\$BCL6_02        | BCL6                                              | 1 | 0 | V\$HNF3_Q6_01 | HNF3                                                                  | 21 | 0 |
| V\$HOXB3_01    | HOXB3                                  | 13 | 0 | V\$CREBATF_Q6     | CREB, ATF                                         | 1 | 0 | V\$ICSBP_Q6   | ICSBP                                                                 | 21 | 0 |
| V\$HOXB4_01    | HOXB4                                  | 13 | 0 | V\$CREBP1CJUN_01  | CRE-binding protein 1:c-Jun heterodimer           | 1 | 0 | V\$ISX_01     | isx                                                                   | 21 | 0 |
| V\$HOXB9_01    | HOXB9                                  | 13 | 0 | V\$EGR1_01        | Egr-1/Krox-24/NGFI-A immediate-early gene product | 1 | 0 | V\$LMO2COM_01 | complex of Lmo2 bound to Tal-1, E2A proteins, and GATA-1, half-site 1 | 21 | 0 |
| V\$HOXC4_01    | HOXC4                                  | 13 | 0 | V\$ERG_01         | ERG                                               | 1 | 0 | V\$LRF_Q2     | LRF                                                                   | 21 | 0 |
| V\$HOXC5_01    | HOXC5                                  | 13 | 0 | V\$EVI1_02        | ectopic viral integration site 1 encoded factor   | 1 | 0 | V\$MEIS1_02   | Meis1                                                                 | 21 | 0 |
| V\$HOXD3_01    | HOXD3                                  | 13 | 0 | V\$FOXO4_01       | fork head box O4                                  | 1 | 0 | V\$MEIS2_01   | Meis2                                                                 | 21 | 0 |
| V\$ISL2_01     | Isl2                                   | 13 | 0 | V\$FREAC2_01      | Fork head RELATED Activator-2                     | 1 | 0 | V\$MRG2_01    | MRG2                                                                  | 21 | 0 |
| V\$ISRE_01     | interferon-stimulated response element | 13 | 0 | V\$FREAC3_01      | Fork head RELATED Activator-3                     | 1 | 0 | V\$MYOD_01    | myoblast determination gene product                                   | 21 | 0 |
| V\$OLF1_01     | olfactory neuron-specific factor       | 13 | 0 | V\$FXR_IR1_Q6     | FXR inverted repeat 1                             | 1 | 0 | V\$MZF1_Q5    | MZF1                                                                  | 21 | 0 |
| V\$PAX_Q6      | Pax                                    | 13 | 0 | V\$GABP_B         | GA binding protein                                | 1 | 0 | V\$NKX24_01   | Nkx2-4                                                                | 21 | 0 |
| V\$PROP1_02    | Prop-1                                 | 13 | 0 | V\$GRE_C          | Glucocorticoid response element                   | 1 | 0 | V\$NKX25_03   | NKX25                                                                 | 21 | 0 |
| V\$RORBETA_Q2  | RORBETA                                | 13 | 0 | V\$HAND1E47_01    | Hand1:E47 heterodimer                             | 1 | 0 | V\$NKX26_01   | Nkx2-6                                                                | 21 | 0 |
| V\$VSX1_01     | Vsx1                                   | 13 | 0 | V\$IK3_01         | lkaros 3                                          | 1 | 0 | V\$NRSF_01    | neuron-restrictive silencer factor                                    | 21 | 0 |
| MA0062.2       | GABPA                                  | 12 | 0 | V\$IPF1_02        | A1                                                | 1 | 0 | V\$OBOX1_01   | Obox1                                                                 | 21 | 0 |
| MA0084.1       | SRY                                    | 12 | 0 | V\$ISRE_01        | interferon-stimulated response element            | 1 | 0 | V\$OBOX6_01   | Obox6                                                                 | 21 | 0 |
| MA0093.1       | USF1                                   | 12 | 0 | V\$LRH1_Q5        | LRH1                                              | 1 | 0 | V\$SIX4_01    | six4                                                                  | 21 | 0 |
| V\$BARHL1_01   | Barhl-1                                | 12 | 0 | V\$MEIS1AHOXA9_01 | Meis-1a:HOXA9 heterodimeric binding               | 1 | 0 | V\$SIX6_01    | Six-6                                                                 | 21 | 0 |
| V\$CEBPE_01    | cebpe                                  | 12 | 0 | V\$MYB_Q6         | c-Myb                                             | 1 | 0 | V\$T3R_Q6     | half-site matrix                                                      | 21 | 0 |
| V\$CREBP1CJU   | CRE-binding protein 1:c-Jun            | 12 | 0 | V\$MYOGNF1_01     | myogenin / nuclear factor 1 or related            | 1 | 0 | V\$BLIMP1_Q6  | BLIMP1                                                                | 20 | 0 |

|               |             |    |   |                     |                                                                                   |   |   |                         |                                 |    |   |
|---------------|-------------|----|---|---------------------|-----------------------------------------------------------------------------------|---|---|-------------------------|---------------------------------|----|---|
| N_01          | heterodimer |    |   |                     | factors                                                                           |   |   |                         |                                 |    |   |
| V\$GLI3_Q5_01 | GLI3        | 12 | 0 | V\$NFAT_Q4_01       | NF-AT                                                                             | 1 | 0 | V\$BRN2_01              | POU factor Brn-2                | 20 | 0 |
| V\$HOXA4_01   | HOXA4       | 12 | 0 | V\$NFMUE1_Q6        | NF-muE1                                                                           | 1 | 0 | V\$CACBINDINGPROTEIN_Q6 | CAC-binding protein             | 20 | 0 |
| V\$HOXA9_01   | hoxa9       | 12 | 0 | V\$NURR1_Q3         | NURR1                                                                             | 1 | 0 | V\$CDX_Q5               | Cdx                             | 20 | 0 |
| V\$HOXB8_01   | HOXB8       | 12 | 0 | V\$P50RELAP65_Q5_01 | P50:RELA-P65                                                                      | 1 | 0 | V\$CEBP_Q2              | CCAAT/enhancer binding factor   | 20 | 0 |
| V\$NKX25_Q5   | Nkx2-5      | 12 | 0 | V\$PTF1BETA_Q6      | PTF1-beta                                                                         | 1 | 0 | V\$EAR2_Q2              | EAR2                            | 20 | 0 |
| V\$NKX3A_02   | Nkx3A       | 12 | 0 | V\$RBPJK_Q4         | RBP-Jkappa                                                                        | 1 | 0 | V\$EBF_Q6               | EBF                             | 20 | 0 |
| V\$PAX7_01    | Pax-7       | 12 | 0 | V\$RFX3_01          | RFX3 dimer                                                                        | 1 | 0 | V\$FOXO4_01             | fork head box O4                | 20 | 0 |
| V\$PITX2_01   | PITX2       | 12 | 0 | V\$TAL1ALPHAE47_01  | Tal-1alpha:E47 heterodimer                                                        | 1 | 0 | V\$HB9_01               | HB9                             | 20 | 0 |
| V\$PMX2B_01   | PMX2B       | 12 | 0 | V\$UF1H3BETA_Q6     | UF1H3BETA                                                                         | 1 | 0 | V\$HNF3B_01             | Hepatocyte Nuclear Factor 3beta | 20 | 0 |
| V\$TFEB_01    | TFEB        | 12 | 0 | V\$VBP_01           | PAR-type chicken vitellogenin promoter-binding protein                            | 1 | 0 | V\$NERF_Q2              | new ets-related factor 1a       | 20 | 0 |
| V\$SOX_01     | SOX         | 12 | 1 | V\$VDR_Q3           | vitamin D receptor; mediates vitamin D3-signaling, often dimerizes with RXR-alpha | 1 | 0 | V\$NKX11_01             | Nkx1-1                          | 20 | 0 |
| MA0101.1      | REL         | 11 | 0 | V\$VDRRXR_01        | VDR:RXR                                                                           | 1 | 0 | V\$NKX21_01             | Nkx2-1                          | 20 | 0 |
| V\$BSX_01     | Bsx         | 11 | 0 | V\$ZFP206_01        | Zfp206                                                                            | 1 | 0 | V\$NRF2_01              | nuclear respiratory factor 2    | 20 | 0 |
| V\$CREL_01    | c-Rel       | 11 | 0 | V\$AIRE_02          | AIRE                                                                              | 1 | 1 | V\$PAX2_02              | paired box factor 2             | 20 | 0 |
| V\$ESX1_01    | Esx1        | 11 | 0 | V\$DEC_Q1           | DEC                                                                               | 1 | 1 | V\$PKNOX2_01            | PKNOX2                          | 20 | 0 |
| V\$HB24_01    | HB24        | 11 | 0 | V\$PARP_Q3          | PARP                                                                              | 1 | 1 | V\$PUR1_Q4              | PUR1                            | 20 | 0 |
| V\$HOXC9_01   | HOXC9       | 11 | 0 | V\$PXRRXR_01        | RXR half-site                                                                     | 1 | 1 | V\$SIRT6_01             | SIRT6                           | 20 | 0 |
| V\$HSF_Q6     | HSF         | 11 | 0 | V\$SOX17_01         | half-site                                                                         | 1 | 1 | V\$SOX4_01              | SOX4                            | 20 | 0 |
| V\$LHX9_01    | Lhx9        | 11 | 0 | V\$ZID_01           | zinc finger with interaction domain                                               | 1 | 1 | V\$SP1SP3_Q4            | SP1:SP3                         | 20 | 0 |
| V\$MSX1_02    | Msx-1       | 11 | 0 | V\$BRF1_01          | BRF-1                                                                             | 1 | 8 | V\$STAT1STAT1_Q3        | STAT1:STAT1                     | 20 | 0 |

|                     |                              |    |   |                 |                                   |   |    |                 |                                     |    |   |
|---------------------|------------------------------|----|---|-----------------|-----------------------------------|---|----|-----------------|-------------------------------------|----|---|
| V\$OTP_01           | OTP                          | 11 | 0 | V\$CDPCR1_01    | cut-like homeodomain protein      | 1 | 10 | V\$STAT_Q6      | STAT                                | 20 | 0 |
| MA0050.1            | IRF1                         | 10 | 0 | MA0046.1        | HNF1A                             | 0 | 1  | V\$TFII_Q6      | TFII-I                              | 20 | 0 |
| MA0061.1            | NF-kappaB                    | 10 | 0 | MA0070.1        | PBX1                              | 0 | 1  | V\$UF1H3BETA_Q6 | UF1H3BETA                           | 20 | 0 |
| MA0143.1            | Sox2                         | 10 | 0 | MA0073.1        | RREB1                             | 0 | 1  | MA0138.2        | REST                                | 19 | 0 |
| V\$CDX_Q5           | Cdx                          | 10 | 0 | MA0078.1        | Sox17                             | 0 | 1  | MA0144.1        | Stat3                               | 19 | 0 |
| V\$DOBOX5_01        | Dobox5                       | 10 | 0 | MA0084.1        | SRY                               | 0 | 1  | MA0152.1        | NFATC2                              | 19 | 0 |
| V\$GF11_01          | growth factor independence 1 | 10 | 0 | MA0088.1        | znf143                            | 0 | 1  | V\$KROX_Q6      | KROX                                | 19 | 0 |
| V\$HFH8_01          | HNF-3/Fkh Homolog-8          | 10 | 0 | MA0130.1        | ZNF354C                           | 0 | 1  | V\$PREP1_01     | PREP1                               | 19 | 0 |
| V\$HOXD1_01         | HOXD1                        | 10 | 0 | MA0140.1        | Tal1::Gata1                       | 0 | 1  | V\$SOX9_Q4      | SOX9                                | 19 | 0 |
| V\$IPF1_06          | ipf1                         | 10 | 0 | MA0141.1        | Esrrb                             | 0 | 1  | V\$TBP_Q6       | TBP                                 | 19 | 0 |
| V\$K2B_01           | K-2b                         | 10 | 0 | V\$AFP1_Q6      | AFP1                              | 0 | 1  | V\$ZFP281_01    | Zfp281                              | 19 | 0 |
| V\$MYC_Q2           | Myc                          | 10 | 0 | V\$ARX_01       | Arx                               | 0 | 1  | I\$ANTP_Q6_01   | Antp                                | 18 | 0 |
| V\$NFKAPPAB_01      | NF-kappaB                    | 10 | 0 | V\$CART1_01     | Cart-1 (cartilage homeoprotein 1) | 0 | 1  | V\$E2A_Q6       | E2A                                 | 18 | 0 |
| V\$NKX12_01         | Nkx1-2                       | 10 | 0 | V\$CDC5_01      | cell division control protein 5   | 0 | 1  | V\$FOXO1_01     | fork head box O1                    | 18 | 0 |
| V\$POU6F1_03        | POU6F1                       | 10 | 0 | V\$CEBPGAMMA_Q6 | C/EBPgamma                        | 0 | 1  | V\$IRF7_01      | interferon regulatory factor 7      | 18 | 0 |
| V\$SATB1_Q3         | SATB1                        | 10 | 0 | V\$CNOT3_01     | CNOT3                             | 0 | 1  | V\$LHX8_01      | Lhx8                                | 18 | 0 |
| V\$TAL1ALPHA_E47_01 | Tal-1alpha:E47 heterodimer   | 10 | 0 | V\$CPHX_01      | Cphx                              | 0 | 1  | V\$NRSE_B       | neural-restrictive-silencer-element | 18 | 0 |
| V\$UNCX4.1_01       | Uncx-4.1                     | 10 | 0 | V\$DBX2_01      | Dbx-2                             | 0 | 1  | V\$TATA_C       | Retroviral TATA box                 | 18 | 0 |
| V\$SIRT6_01         | SIRT6                        | 10 | 1 | V\$DLX1_01      | Dlx-1                             | 0 | 1  | V\$TEL2_Q6      | Tel-2                               | 18 | 0 |
| MA0031.1            | FOXD1                        | 9  | 0 | V\$DMRT1_01     | DMRT1                             | 0 | 1  | MA0039.2        | Klf4                                | 17 | 0 |
| MA0038.1            | Gfi                          | 9  | 0 | V\$DOBOX5_01    | Dobox5                            | 0 | 1  | MA0050.1        | IRF1                                | 17 | 0 |
| MA0155.1            | INSM1                        | 9  | 0 | V\$DR4_Q2       | direct repeat 4                   | 0 | 1  | V\$CEBPGAMMA_Q6 | C/EBPgamma                          | 17 | 0 |
| MA0442.1            | SOX10                        | 9  | 0 | V\$E2F_03       | E2F                               | 0 | 1  | V\$CPHX_01      | Cphx                                | 17 | 0 |
| V\$CDP_03           | CDP                          | 9  | 0 | V\$ERR1_Q2      | estrogen-related                  | 0 | 1  | V\$FOXO3_01     | fork head box O3                    | 17 | 0 |

|                |                                           |   |   |              |                                               |   |   |                 |                                        |    |   |
|----------------|-------------------------------------------|---|---|--------------|-----------------------------------------------|---|---|-----------------|----------------------------------------|----|---|
|                |                                           |   |   |              | receptor alpha                                |   |   |                 |                                        |    |   |
| V\$CDX1_01     | Cdx-1                                     | 9 | 0 | V\$ETF_Q6    | ETF                                           | 0 | 1 | V\$FREAC7_01    | Fork head RElated ACTivator-7          | 17 | 0 |
| V\$CDX2_01     | Cdx-2                                     | 9 | 0 | V\$EVX2_01   | Evx2                                          | 0 | 1 | V\$ISRE_01      | interferon-stimulated response element | 17 | 0 |
| V\$CREB_Q3     | CREB                                      | 9 | 0 | V\$FOXJ2_01  | fork head box J 2                             | 0 | 1 | V\$LFA1_Q6      | LF-A1                                  | 17 | 0 |
| V\$FAC1_01     | fetal Alz-50 clone 1                      | 9 | 0 | V\$FOXO1_Q5  | FOXO1                                         | 0 | 1 | V\$TEF_Q6       | TEF                                    | 17 | 0 |
| V\$FOXJ3_01    | foxj3                                     | 9 | 0 | V\$GCM_Q2    | GCM                                           | 0 | 1 | V\$USF_Q6_01    | USF                                    | 17 | 0 |
| V\$FREAC7_01   | Fork head RElated ACTivator-7             | 9 | 0 | V\$GSC_01    | Gsc                                           | 0 | 1 | MA0046.1        | HNF1A                                  | 16 | 0 |
| V\$HMX1_02     | HMX1                                      | 9 | 0 | V\$GSH2_01   | GSH2                                          | 0 | 1 | V\$E2F_Q2       | E2F                                    | 16 | 0 |
| V\$HOX13_02    | HOXA5                                     | 9 | 0 | V\$GZF1_01   | plays a role in renal branching morphogenesis | 0 | 1 | V\$EVX2_01      | Evx2                                   | 16 | 0 |
| V\$HOXA6_01    | HOXA6                                     | 9 | 0 | V\$HBP1_Q2   | hbp1                                          | 0 | 1 | V\$GADP_01      | Growth-associated binding protein      | 16 | 0 |
| V\$HSF1_Q6     | HSF1                                      | 9 | 0 | V\$HFH1_01   | HNF-3/Fkh Homolog 1                           | 0 | 1 | V\$GAF_Q6       | GAF                                    | 16 | 0 |
| V\$MEF2_02     | myogenic MADS factor MEF-2                | 9 | 0 | V\$HIC1_03   | HIC1                                          | 0 | 1 | V\$HSF_Q6       | HSF                                    | 16 | 0 |
| V\$NKX23_01    | Nkx2-3                                    | 9 | 0 | V\$HMX1_02   | HMX1                                          | 0 | 1 | V\$PTF1BETA_Q6  | PTF1-beta                              | 16 | 0 |
| V\$NURR1_Q3    | NURR1                                     | 9 | 0 | V\$HNF1_01   | hepatic nuclear factor 1                      | 0 | 1 | V\$SMAD1_01     | SMAD1                                  | 16 | 0 |
| V\$OTX1_01     | Otx1                                      | 9 | 0 | V\$HOXD3_01  | HOXD3                                         | 0 | 1 | V\$ZFP206_01    | Zfp206                                 | 16 | 0 |
| V\$PITX1_01    | Pitx1                                     | 9 | 0 | V\$HSF1_01   | heat shock factor 1                           | 0 | 1 | MA0062.2        | GABPA                                  | 15 | 0 |
| V\$PPAR_DR1_Q2 | PPAR direct repeat 1                      | 9 | 0 | V\$IRF1_01   | interferon regulatory factor 1                | 0 | 1 | V\$ERG_01       | ERG                                    | 15 | 0 |
| V\$ZFP206_01   | Zfp206                                    | 9 | 0 | V\$IRF7_01   | interferon regulatory factor 7                | 0 | 1 | V\$FOXD3_01     | fork head box D3                       | 15 | 0 |
| V\$PXRXR_02    | PXR half-site                             | 9 | 3 | V\$IRF_Q6_01 | IRF                                           | 0 | 1 | V\$HNF3ALPHA_Q6 | HNF3alpha                              | 15 | 0 |
| V\$CART1_03    | CART1                                     | 8 | 0 | V\$LBX2_01   | Lbx2                                          | 0 | 1 | V\$NFMUE1_Q6    | NF-muE1                                | 15 | 0 |
| V\$CREBP1_01   | cAMP-responsive element binding protein 1 | 8 | 0 | V\$LEF1_Q2   | LEF1                                          | 0 | 1 | V\$P53_03       | tumor suppressor p53                   | 15 | 0 |

|              |                     |   |   |               |                                     |   |   |               |                              |    |   |
|--------------|---------------------|---|---|---------------|-------------------------------------|---|---|---------------|------------------------------|----|---|
| V\$EN2_01    | En-2                | 8 | 0 | V\$LHX3_01    | LIM homeobox transcription factor 3 | 0 | 1 | V\$SIX1_01    | Six-1                        | 15 | 0 |
| V\$HFH1_01   | HNF-3/Fkh Homolog 1 | 8 | 0 | V\$LHX4_01    | Lhx4                                | 0 | 1 | V\$SOX2_Q6    | SOX2                         | 15 | 0 |
| V\$HOXA7_02  | HOXA7               | 8 | 0 | V\$LHX5_01    | Lhx5                                | 0 | 1 | V\$TCF4_01    | TCF-4                        | 15 | 0 |
| V\$HOXB7_01  | HOXB7               | 8 | 0 | V\$LHX61_01   | lhx6.1                              | 0 | 1 | V\$CRX_02     | Crx                          | 14 | 0 |
| V\$HOXC8_01  | HOXC-8              | 8 | 0 | V\$LHX8_01    | Lhx8                                | 0 | 1 | V\$DMRT7_01   | DMRT7                        | 14 | 0 |
| V\$HOXD13_01 | HOXD13              | 8 | 0 | V\$MMEF2_Q6   | myocyte enhancer factor             | 0 | 1 | V\$FOX_Q2     | FOX factors                  | 14 | 0 |
| V\$HSF2_03   | HSF2                | 8 | 0 | V\$MOVOB_01   | MOV0-B                              | 0 | 1 | V\$GATA4_Q3   | GATA-4                       | 14 | 0 |
| V\$KROX_Q6   | KROX                | 8 | 0 | V\$MSX1_02    | Msx-1                               | 0 | 1 | V\$GFI1_01    | growth factor independence 1 | 14 | 0 |
| V\$LBX2_01   | Lbx2                | 8 | 0 | V\$MTF1_Q4    | MTF-1                               | 0 | 1 | V\$HFH1_01    | HNF-3/Fkh Homolog 1          | 14 | 0 |
| V\$LRH1_Q5   | LRH1                | 8 | 0 | V\$NKX22_01   | NK2 class homeobox factor 2         | 0 | 1 | V\$KLF15_Q2   | KLF15                        | 14 | 0 |
| V\$MAZR_01   | MAZ related factor  | 8 | 0 | V\$NKX23_01   | Nkx2-3                              | 0 | 1 | V\$MOVOB_01   | MOV0-B                       | 14 | 0 |
| V\$NUR77_Q5  | NUR77               | 8 | 0 | V\$NUR77_Q5   | NUR77                               | 0 | 1 | V\$RNF96_01   | RNF96                        | 14 | 0 |
| V\$PBX1_04   | Pbx1                | 8 | 0 | V\$OCT1_B     | Octamer binding factor 1            | 0 | 1 | V\$RSRFC4_Q2  | RSRFC4                       | 14 | 0 |
| V\$PR_Q2     | half-site matrix    | 8 | 0 | V\$OCT2_02    | 2-Oct                               | 0 | 1 | V\$SMAD3_Q6   | SMAD3                        | 14 | 0 |
| V\$PSX1_01   | PSX1                | 8 | 0 | V\$OCTAMER_01 | Octamer                             | 0 | 1 | V\$SP3_Q3     | Sp3                          | 14 | 0 |
| V\$REX1_03   | REX1                | 8 | 0 | V\$PIT1_Q6    | Pit-1                               | 0 | 1 | V\$ATF5_01    | ATF5 binding site            | 13 | 0 |
| V\$LRF_Q2    | LRF                 | 8 | 5 | V\$PITX2_01   | PITX2                               | 0 | 1 | V\$GABP_B     | GA binding protein           | 13 | 0 |
| MA0164.1     | Nr2e3               | 7 | 0 | V\$PLZF_02    | PLZF                                | 0 | 1 | V\$HELIOSA_02 | Helios A                     | 13 | 0 |
| MA0258.1     | ESR2                | 7 | 0 | V\$POU3F2_01  | POU3F2                              | 0 | 1 | V\$MAFA_Q4_01 | MAFA                         | 13 | 0 |
| V\$ARX_01    | Arx                 | 7 | 0 | V\$RAX_01     | rax                                 | 0 | 1 | V\$PITX3_01   | Pitx3                        | 13 | 0 |
| V\$DAX1_01   | Dax1                | 7 | 0 | V\$RNF96_01   | RNF96                               | 0 | 1 | V\$PXRRXR_02  | PXR half-site                | 13 | 0 |
| V\$EGR_Q6    | Egr                 | 7 | 0 | V\$RORA1_01   | RAR-related orphan receptor alpha1  | 0 | 1 | V\$SOX_Q6     | SOX                          | 13 | 0 |
| V\$HFH4_01   | HFH4 (FOXJ1)        | 7 | 0 | V\$RXRG_01    | RXRG dimer                          | 0 | 1 | MA0101.1      | REL                          | 12 | 0 |
| V\$HOXB5_01  | HoxB5               | 7 | 0 | V\$VAX2_01    | Vax-2                               | 0 | 1 | MA0107.1      | RELA                         | 12 | 0 |



|                |                                                     |   |    |                 |                                    |   |   |                     |                                     |    |   |
|----------------|-----------------------------------------------------|---|----|-----------------|------------------------------------|---|---|---------------------|-------------------------------------|----|---|
| V\$HOXB6_01    | HOXB6                                               | 7 | 0  | V\$ZF5_01       | ZF5                                | 0 | 1 | MA0135.1            | Lhx3                                | 12 | 0 |
| V\$LH2_01      | LH-2                                                | 7 | 0  | V\$ZFX_01       | Zfx                                | 0 | 1 | V\$CREL_01          | c-Rel                               | 12 | 0 |
| V\$MAX_01      | Max                                                 | 7 | 0  | V\$ZNF515_01    | Glis binding sites                 | 0 | 1 | V\$FOXJ2_02         | fork head box J 2                   | 12 | 0 |
| V\$MOVOB_01    | MOV0-B                                              | 7 | 0  | MA0042.1        | FOX11                              | 0 | 2 | V\$KID3_01          | Kid3                                | 12 | 0 |
| V\$OBOX5_01    | Obox5                                               | 7 | 0  | MA0068.1        | Pax4                               | 0 | 2 | V\$NFKAPPAB65_01    | NF-kappaB (p65)                     | 12 | 0 |
| V\$OTX2_01     | Otx2                                                | 7 | 0  | MA0087.1        | Sox5                               | 0 | 2 | V\$NFKB_Q6_01       | NF-kappaB                           | 12 | 0 |
| V\$RELBPF52_01 | kappaB site                                         | 7 | 0  | MA0114.1        | HNF4A                              | 0 | 2 | V\$P50RELAP65_Q5_01 | P50:RELA-P65                        | 12 | 0 |
| V\$SHOX2_01    | Shox2                                               | 7 | 0  | MA0135.1        | Lhx3                               | 0 | 2 | V\$SIX2_01          | Six-2                               | 12 | 0 |
| V\$SP1SP3_Q4   | SP1:SP3                                             | 7 | 0  | MA0160.1        | NR4A2                              | 0 | 2 | V\$SIX3_01          | Six-3                               | 12 | 0 |
| V\$STAT5B_01   | signal transducer and activator of transcription 5b | 7 | 0  | V\$AHR_01       | aryl hydrocarbon / dioxin receptor | 0 | 2 | V\$TAL1ALPHAE47_01  | Tal-1alpha:E47 heterodimer          | 12 | 0 |
| V\$VAX1_01     | Vax-1                                               | 7 | 0  | V\$BARHL1_01    | Barhl-1                            | 0 | 2 | V\$ZBED6_01         | ZBED6                               | 12 | 0 |
| V\$TBX5_02     | TBX5                                                | 7 | 1  | V\$CRX_02       | Crx                                | 0 | 2 | MA0041.1            | Foxd3                               | 11 | 0 |
| V\$SREBP1_Q5   | SREBP1                                              | 7 | 3  | V\$DLX5_01      | dlx5                               | 0 | 2 | MA0113.1            | NR3C1                               | 11 | 0 |
| V\$RPC155_01   | RPC155                                              | 7 | 10 | V\$FOXP1_01     | FOXP1                              | 0 | 2 | V\$CDC5_01          | cell division control protein 5     | 11 | 0 |
| MA0004.1       | Arnt                                                | 6 | 0  | V\$FREAC7_01    | Fork head RELATED Activator-7      | 0 | 2 | V\$E2F4DP2_01       | E2F-4:DP-2 heterodimer              | 11 | 0 |
| V\$BCL6_02     | BCL6                                                | 6 | 0  | V\$GATA2_02     | GATA-binding factor 2              | 0 | 2 | V\$GR_Q6_01         | half-site matrix                    | 11 | 0 |
| V\$CMYC_02     | c-Myc heterodimer (with a 26-29 kDa factor)         | 6 | 0  | V\$GLI_Q2       | GLI                                | 0 | 2 | V\$HMEF2_Q6         | myocyte enhancer factor             | 11 | 0 |
| V\$FOX_Q2      | FOX factors                                         | 6 | 0  | V\$HNF4ALPHA_Q6 | HNF4alpha                          | 0 | 2 | MA0040.1            | Foxq1                               | 10 | 0 |
| V\$FOXJ2_01    | fork head box J 2                                   | 6 | 0  | V\$HOXB8_01     | HOXB8                              | 0 | 2 | MA0060.1            | NFYA                                | 10 | 0 |
| V\$FREAC2_01   | Fork head RELATED Activator-2                       | 6 | 0  | V\$HOXC8_01     | HOXC-8                             | 0 | 2 | MA0143.1            | Sox2                                | 10 | 0 |
| V\$FREAC3_01   | Fork head RELATED Activator-3                       | 6 | 0  | V\$IRX5_01      | Irx5                               | 0 | 2 | MA0145.1            | Tcfcp2l1                            | 10 | 0 |
| V\$FREAC4_01   | Fork head RELATED Activator-4                       | 6 | 0  | V\$ISL2_01      | Isl2                               | 0 | 2 | V\$CEBPB_01         | CCAAT/enhancer binding protein beta | 10 | 0 |

|                |                                               |   |    |                |                                         |   |   |                              |                                            |    |   |
|----------------|-----------------------------------------------|---|----|----------------|-----------------------------------------|---|---|------------------------------|--------------------------------------------|----|---|
| V\$HFH3_01     | HFH-3 (HNF3/fork head homolog 3)              | 6 | 0  | V\$LMX1B_01    | lmx1b                                   | 0 | 2 | V\$E2F1DP1RB_01              | Rb:E2F-1:DP-1 trimeric complex             | 10 | 0 |
| V\$HOMEZ_01    | Homez                                         | 6 | 0  | V\$MIZF_01     | MIZF                                    | 0 | 2 | V\$FOXP3_01                  | forkhead box P3                            | 10 | 0 |
| V\$HOXA2_01    | HoxA2                                         | 6 | 0  | V\$MSX3_01     | Msx-3                                   | 0 | 2 | V\$FREAC3_01                 | Fork head RElated Activator-3              | 10 | 0 |
| V\$MYCMAX_01   | c-Myc:Max heterodimer                         | 6 | 0  | V\$NCX_02      | Ncx                                     | 0 | 2 | V\$HNF6_Q6                   | HNF6                                       | 10 | 0 |
| V\$NKX62_Q2    | NK related homeobox factor 6-2                | 6 | 0  | V\$OTX1_01     | Otx1                                    | 0 | 2 | V\$MAF_Q6                    | MAF                                        | 10 | 0 |
| V\$OCT4_01     | Sox2-Oct4 joint motif, in silico predicted    | 6 | 0  | V\$OTX2_01     | Otx2                                    | 0 | 2 | V\$NFY_01                    | nuclear factor Y (Y-box binding factor)    | 10 | 0 |
| V\$P50P50_Q3   | P50:P50                                       | 6 | 0  | V\$POU5F1_01   | POU5F1 b.s.                             | 0 | 2 | V\$OCT4_01                   | Sox2-Oct4 joint motif, in silico predicted | 10 | 0 |
| V\$TITF1_Q3    | TTF-1, TITF1 (thyroid transcription factor 1) | 6 | 0  | V\$RHOX11_01   | Rhox11                                  | 0 | 2 | MA0048.1                     | NHLH1                                      | 9  | 0 |
| V\$NKX22_02    | NKX22                                         | 6 | 1  | V\$S8_01       | S8                                      | 0 | 2 | MA0052.1                     | MEF2A                                      | 9  | 0 |
| V\$PPARA_Q6    | half-site                                     | 6 | 1  | V\$TRF1_01     | TRF1                                    | 0 | 2 | MA0061.1                     | NF-kappaB                                  | 9  | 0 |
| V\$CPHX_01     | Cphx                                          | 6 | 2  | V\$ZIC1_01     | zinc finger protein of the cerebellum 1 | 0 | 2 | MA0150.1                     | NFE2L2                                     | 9  | 0 |
| MA0151.1       | ARID3A                                        | 6 | 3  | MA0040.1       | Foxq1                                   | 0 | 3 | V\$CACCCBINDINGFACTO<br>R_Q6 | CACCC-binding factor                       | 9  | 0 |
| V\$LYF1_01     | LyF-1                                         | 6 | 13 | MA0057.1       | MZF1_5-13                               | 0 | 3 | V\$CACD_01                   | CACD                                       | 9  | 0 |
| MA0030.1       | FOXF2                                         | 5 | 0  | MA0111.1       | Spz1                                    | 0 | 3 | V\$DR1_Q3                    | Direct repeat 1                            | 9  | 0 |
| MA0114.1       | HNF4A                                         | 5 | 0  | V\$AHRHIF_Q6   | AhR, Arnt, HIF-1                        | 0 | 3 | V\$E2F4DP1_01                | E2F-4:DP-1 heterodimer                     | 9  | 0 |
| MA0135.1       | Lhx3                                          | 5 | 0  | V\$BARHL2_01   | Barhl2                                  | 0 | 3 | V\$FREAC2_01                 | Fork head RElated Activator-2              | 9  | 0 |
| MA0142.1       | Pou5f1                                        | 5 | 0  | V\$BRACH_01    | Brachyury                               | 0 | 3 | V\$HFH8_01                   | HNF-3/Fkh Homolog-8                        | 9  | 0 |
| V\$BRN2_01     | POU factor Brn-2                              | 5 | 0  | V\$CDPCR3HD_01 | cut-like homeodomain protein            | 0 | 3 | V\$HIC1_02                   | HIC1                                       | 9  | 0 |
| V\$COUP_DR1_Q6 | COUP direct repeat 1                          | 5 | 0  | V\$CHCH_01     | Churchill                               | 0 | 3 | V\$HP1SITEFACTOR_Q6          | HP1 site factor                            | 9  | 0 |

|                |                                         |   |   |              |                                     |   |   |                  |                                               |   |   |
|----------------|-----------------------------------------|---|---|--------------|-------------------------------------|---|---|------------------|-----------------------------------------------|---|---|
| V\$EN1_02      | En-1                                    | 5 | 0 | V\$DMRT5_01  | DMRT5                               | 0 | 3 | V\$MAZR_01       | MAZ related factor                            | 9 | 0 |
| V\$HOXB13_01   | HOXB13                                  | 5 | 0 | V\$DMRT7_01  | DMRT7                               | 0 | 3 | V\$TCF3_01       | TCF-3                                         | 9 | 0 |
| V\$IK1_01      | lkaros 1                                | 5 | 0 | V\$FAC1_01   | fetal Alz-50 clone 1                | 0 | 3 | V\$TTF1_Q6       | TTF-1 (Nkx2-1)                                | 9 | 1 |
| V\$IRF7_01     | interferon<br>regulatory factor 7       | 5 | 0 | V\$FOXO3A_Q1 | FOXO3A                              | 0 | 3 | MA0051.1         | IRF2                                          | 8 | 0 |
| V\$LHX61_01    | lhx6.1                                  | 5 | 0 | V\$HOXA7_01  | HOXA7                               | 0 | 3 | V\$COMP1_01      | COMP1                                         | 8 | 0 |
| V\$NKX29_01    | Nkx2-9                                  | 5 | 0 | V\$HOXC10_01 | HOXC10                              | 0 | 3 | V\$CREB_01       | cAMP-responsive<br>element binding<br>protein | 8 | 0 |
| V\$NKX32_02    | Nkx3-2                                  | 5 | 0 | V\$IRX2_01   | Irx2                                | 0 | 3 | V\$CREBP1CJUN_01 | CRE-binding protein<br>1:c-Jun heterodimer    | 8 | 0 |
| V\$RFX3_01     | RFX3 dimer                              | 5 | 0 | V\$IRX4_01   | IRX4                                | 0 | 3 | V\$E2F1DP1_01    | E2F-1:DP-1<br>heterodimer                     | 8 | 0 |
| V\$RSRFC4_01   | related to serum<br>response factor, C4 | 5 | 0 | V\$ISL1_Q6   | ISL1                                | 0 | 3 | V\$EBOX_Q6_01    | Ebox                                          | 8 | 0 |
| V\$S8_02       | S8                                      | 5 | 0 | V\$LMX1_01   | Lmx-1                               | 0 | 3 | V\$EHF_01        | EHF                                           | 8 | 0 |
| V\$DRI1_01     | DRI1 b.s.                               | 5 | 1 | V\$MEF2_01   | myogenic enhancer<br>factor 2       | 0 | 3 | V\$ER_Q6_02      | half-site matrix, half-<br>ERE                | 8 | 0 |
| V\$DELTAEF1_01 | deltaEF1                                | 5 | 4 | V\$NKX11_01  | Nkx1-1                              | 0 | 3 | V\$HSF2_01       | heat shock factor 2                           | 8 | 0 |
| MA0052.1       | MEF2A                                   | 4 | 0 | V\$NKX21_01  | Nkx2-1                              | 0 | 3 | V\$IRF8_Q6       | IRF8                                          | 8 | 0 |
| MA0059.1       | MYC::MAX                                | 4 | 0 | V\$NKX26_01  | Nkx2-6                              | 0 | 3 | V\$KAISO_01      | KAISO                                         | 8 | 0 |
| MA0104.2       | Mycn                                    | 4 | 0 | V\$NKX3A_02  | Nkx3A                               | 0 | 3 | V\$LTF_Q6        | LTF                                           | 8 | 0 |
| MA0113.1       | NR3C1                                   | 4 | 0 | V\$OBOX3_01  | Obox3                               | 0 | 3 | V\$NFKAPPAB_01   | NF-kappaB                                     | 8 | 0 |
| V\$CHCH_01     | Churchill                               | 4 | 0 | V\$PNR_01    | PNR                                 | 0 | 3 | V\$P50P50_Q3     | P50:P50                                       | 8 | 0 |
| V\$ERG_01      | ERG                                     | 4 | 0 | V\$PPARA_Q6  | half-site                           | 0 | 3 | MA0075.1         | Prrx2                                         | 8 | 1 |
| V\$EVX1_01     | Evx-1                                   | 4 | 0 | V\$SATB1_01  | Consensus SATB1<br>Binding Sequence | 0 | 3 | MA0065.2         | PPARG::RXRA                                   | 7 | 0 |
| V\$GFI1B_01    | Gfi1b                                   | 4 | 0 | V\$ZNF219_01 | ZNF219                              | 0 | 3 | MA0148.1         | FOXA1                                         | 7 | 0 |
| V\$HOXA1_01    | HOXA1                                   | 4 | 0 | MA0041.1     | Foxd3                               | 0 | 4 | MA0158.1         | HOXA5                                         | 7 | 0 |
| V\$HOXC13_01   | HOXC13                                  | 4 | 0 | MA0124.1     | NKX3-1                              | 0 | 4 | V\$FOXP1_01      | FOXP1                                         | 7 | 0 |
| V\$IRX4_01     | IRX4                                    | 4 | 0 | MA0125.1     | Nobox                               | 0 | 4 | V\$HEN1_02       | HEN1                                          | 7 | 0 |

|                 |                                |   |   |              |                                      |   |   |                  |                                                                                   |   |   |
|-----------------|--------------------------------|---|---|--------------|--------------------------------------|---|---|------------------|-----------------------------------------------------------------------------------|---|---|
| V\$OCT2_01      | 2-Oct                          | 4 | 0 | V\$CDX_Q5    | Cdx                                  | 0 | 4 | V\$HSF1_Q6       | HSF1                                                                              | 7 | 0 |
| V\$OCT_C        | Octamer binding site           | 4 | 0 | V\$COUPTF_Q6 | COUPTF                               | 0 | 4 | V\$PLZF_Q2       | PLZF                                                                              | 7 | 0 |
| V\$OTX3_01      | Otx3                           | 4 | 0 | V\$DBX1_01   | Dbx-1                                | 0 | 4 | V\$PPARG_Q6      | half-site                                                                         | 7 | 0 |
| V\$PMX2A_01     | PMX2A                          | 4 | 0 | V\$DLX7_01   | Dlx7                                 | 0 | 4 | V\$RBPJK_Q4      | RBP-Jkappa                                                                        | 7 | 0 |
| V\$POU2F3_01    | POU2F3                         | 4 | 0 | V\$DMRT2_01  | DMRT2                                | 0 | 4 | V\$SP2_01        | SP2                                                                               | 7 | 0 |
| V\$CEBPDELTA_Q6 | C/EBPdelta                     | 4 | 1 | V\$HB24_01   | HB24                                 | 0 | 4 | V\$VDR_Q3        | vitamin D receptor; mediates vitamin D3-signaling, often dimerizes with RXR-alpha | 7 | 0 |
| V\$IK_Q5        | Ikars                          | 4 | 9 | V\$HOXA11_01 | HOXA11                               | 0 | 4 | V\$GKLF_Q2       | GKLF (KLF4)                                                                       | 7 | 1 |
| MA0046.1        | HNF1A                          | 3 | 0 | V\$HOXC12_01 | HOXC12                               | 0 | 4 | V\$MTF1_Q2       | MTF1                                                                              | 7 | 1 |
| V\$ALX4_Q2      | Alx-4                          | 3 | 0 | V\$HOXD11_01 | HOXD11                               | 0 | 4 | V\$SREBP2_Q6     | SREBP2                                                                            | 7 | 3 |
| V\$DLX1_01      | Dlx-1                          | 3 | 0 | V\$HOXD12_01 | HOXD12                               | 0 | 4 | MA0076.1         | ELK4                                                                              | 6 | 0 |
| V\$DLX2_01      | Dlx-2                          | 3 | 0 | V\$ISX_Q1    | isx                                  | 0 | 4 | MA0142.1         | Pou5f1                                                                            | 6 | 0 |
| V\$GSH2_Q1      | GSH2                           | 3 | 0 | V\$LXR_Q3    | LXR                                  | 0 | 4 | V\$E2F1DP2_Q1    | E2F-1:DP-2 heterodimer                                                            | 6 | 0 |
| V\$HMBX1_Q1     | Hmbx1                          | 3 | 0 | V\$OBOX6_Q1  | Obox6                                | 0 | 4 | V\$MAX_Q1        | Max                                                                               | 6 | 0 |
| V\$HMEF2_Q6     | myocyte enhancer factor        | 3 | 0 | V\$PITX1_Q1  | Pitx1                                | 0 | 4 | V\$NFKAPPAB50_Q1 | NF-kappaB (p50)                                                                   | 6 | 0 |
| V\$HNF1B_Q1     | HNF-1beta                      | 3 | 0 | V\$PITX3_Q1  | Pitx3                                | 0 | 4 | V\$OLF1_Q1       | olfactory neuron-specific factor                                                  | 6 | 0 |
| V\$IRF2_Q1      | interferon regulatory factor 2 | 3 | 0 | V\$PLAG1_Q1  | PLAG1 binding site                   | 0 | 4 | V\$RELB_P52_Q1   | kappaB site                                                                       | 6 | 0 |
| V\$IRX5_Q1      | Irx5                           | 3 | 0 | V\$RSRFC4_Q1 | related to serum response factor, C4 | 0 | 4 | V\$STAT5B_Q1     | signal transducer and activator of transcription 5b                               | 6 | 0 |
| V\$MOX1_Q1      | Mox1                           | 3 | 0 | V\$CHOP_Q1   | heterodimers of CHOP and C/EBPalpha  | 0 | 5 | MA0103.1         | ZEB1                                                                              | 6 | 1 |
| V\$MSX2_Q1      | Msx-2                          | 3 | 0 | V\$DLX2_Q1   | Dlx-2                                | 0 | 5 | MA0030.1         | FOXF2                                                                             | 5 | 0 |
| V\$POU1F1_Q6    | POU1F1                         | 3 | 0 | V\$DMRT4_Q1  | DMRT4                                | 0 | 5 | MA0031.1         | FOXD1                                                                             | 5 | 0 |
| V\$RREB1_Q1     | Ras-responsive element binding | 3 | 0 | V\$GLI1_Q2   | GLI1                                 | 0 | 5 | MA0038.1         | Gfi                                                                               | 5 | 0 |

|                  |                                                  |   |   |                     |                                         |   |   |                  |                                           |   |   |
|------------------|--------------------------------------------------|---|---|---------------------|-----------------------------------------|---|---|------------------|-------------------------------------------|---|---|
|                  | protein 1                                        |   |   |                     |                                         |   |   |                  |                                           |   |   |
| V\$SF1_Q6        | SF1                                              | 3 | 0 | V\$HELIOSA_02       | Helios A                                | 0 | 5 | MA0057.1         | MZF1_5-13                                 | 5 | 0 |
| V\$STAF_01       | Se-Cys tRNA gene transcription activating factor | 3 | 0 | V\$HMEF2_Q6         | myocyte enhancer factor                 | 0 | 5 | V\$AFP1_Q6       | AFP1                                      | 5 | 0 |
| V\$STAT3STAT3_Q3 | STAT3:STAT3                                      | 3 | 0 | V\$HOXC11_01        | HOXC11                                  | 0 | 5 | V\$ATF3_Q6       | activating transcription factor 3         | 5 | 0 |
| V\$KID3_01       | Kid3                                             | 3 | 1 | V\$IRX3_01          | Irx-3                                   | 0 | 5 | V\$CEBPE_01      | cebpe                                     | 5 | 0 |
| V\$AML1_Q4       | AML1                                             | 3 | 3 | V\$IRXB3_01         | IRXB3                                   | 0 | 5 | V\$CIZ_01        | CIZ (Cas-associated zinc finger protein)  | 5 | 0 |
| V\$NKX21_01      | Nkx2-1                                           | 3 | 3 | V\$MRF2_01          | modulator recognition factor 2          | 0 | 5 | V\$CNOT3_01      | CNOT3                                     | 5 | 0 |
| V\$SREBP_Q6      | SREBP                                            | 3 | 4 | V\$OBOX2_01         | Obox2                                   | 0 | 5 | V\$CREBATF_Q6    | CREB, ATF                                 | 5 | 0 |
| MA0006.1         | Arnt::Ahr                                        | 2 | 0 | V\$OCT_Q6           | Octamer                                 | 0 | 5 | V\$CREBP1_01     | cAMP-responsive element binding protein 1 | 5 | 0 |
| MA0040.1         | Foxq1                                            | 2 | 0 | V\$OTX_Q1           | OTX                                     | 0 | 5 | V\$DR4_Q2        | direct repeat 4                           | 5 | 0 |
| MA0057.1         | MZF1_5-13                                        | 2 | 0 | V\$SIX1_01          | Six-1                                   | 0 | 5 | V\$FOXJ3_01      | foxj3                                     | 5 | 0 |
| MA0159.1         | RXR::RAR_DR5                                     | 2 | 0 | V\$SOX4_01          | SOX4                                    | 0 | 5 | V\$HFH3_01       | HFH-3 (HNF3/fork head homolog 3)          | 5 | 0 |
| V\$ATF6_01       | activating transcription factor 6                | 2 | 0 | V\$ZIC3_01          | zinc finger protein of the cerebellum 3 | 0 | 5 | V\$NRF1_Q6       | nuclear respiratory factor 1              | 5 | 0 |
| V\$CLOCKBMAL_Q6  | CLOCK:BMAL                                       | 2 | 0 | V\$GATA4_Q3         | GATA-4                                  | 0 | 6 | V\$POU1F1_Q6     | POU1F1                                    | 5 | 0 |
| V\$DLX7_01       | Dlx7                                             | 2 | 0 | V\$GBX1_01          | Gbx1                                    | 0 | 6 | V\$POU3F2_02     | POU3F2                                    | 5 | 0 |
| V\$DOBOX4_01     | Dobox4                                           | 2 | 0 | V\$HOXA13_03        | HOXA13                                  | 0 | 6 | V\$SAP1A_01      | SAP-1a                                    | 5 | 0 |
| V\$DUXL_01       | Duxl                                             | 2 | 0 | V\$HP1SITEFACTOR_Q6 | HP1 site factor                         | 0 | 6 | V\$SOX5_01       | Sox-5                                     | 5 | 0 |
| V\$E2F1DP1RB_01  | Rb:E2F-1:DP-1 trimeric complex                   | 2 | 0 | V\$NKX24_01         | Nkx2-4                                  | 0 | 6 | V\$STAT3STAT3_Q3 | STAT3:STAT3                               | 5 | 0 |
| V\$E2F4DP1_01    | E2F-4:DP-1 heterodimer                           | 2 | 0 | V\$NKX29_01         | Nkx2-9                                  | 0 | 6 | V\$TFEB_01       | TFEB                                      | 5 | 0 |
| V\$E2F4DP2_01    | E2F-4:DP-2 heterodimer                           | 2 | 0 | V\$NKX61_01         | NKX6-1                                  | 0 | 6 | MA0125.1         | Nobox                                     | 5 | 1 |

|                   |                                       |   |   |                |                                         |   |   |                   |                           |   |   |
|-------------------|---------------------------------------|---|---|----------------|-----------------------------------------|---|---|-------------------|---------------------------|---|---|
| V\$EGR3_01        | early growth response gene 3 product  | 2 | 0 | V\$OBOX1_01    | Obox1                                   | 0 | 6 | V\$BRF1_01        | BRF-1                     | 5 | 1 |
| V\$ERR2_01        | ERR2 (ESRRB)                          | 2 | 0 | V\$TERALPHA_Q6 | TERALPHA                                | 0 | 6 | V\$USF2_Q6        | USF2                      | 5 | 1 |
| V\$ETF_Q6         | ETF                                   | 2 | 0 | V\$ZIC2_01     | zinc finger protein of the cerebellum 2 | 0 | 6 | MA0002.2          | RUNX1                     | 4 | 0 |
| V\$HOXA11_01      | HOXA11                                | 2 | 0 | V\$HMGA2_01    | HMGA2 binding site                      | 0 | 6 | MA0006.1          | Arnt::Ahr                 | 4 | 0 |
| V\$HOXA3_02       | HOXA3                                 | 2 | 0 | V\$AMEF2_Q6    | myocyte enhancer factor                 | 0 | 7 | MA0025.1          | NFIL3                     | 4 | 0 |
| V\$IK3_01         | Ikaros 3                              | 2 | 0 | V\$CDP_02      | transcriptional repressor CDP           | 0 | 7 | MA0092.1          | Hand1::Tcfe2a             | 4 | 0 |
| V\$IRX2_01        | Irx2                                  | 2 | 0 | V\$DLX3_01     | dlx3                                    | 0 | 7 | MA0105.1          | NFKB1                     | 4 | 0 |
| V\$IRXB3_01       | IRXB3                                 | 2 | 0 | V\$DMRT3_01    | DMRT3                                   | 0 | 7 | MA0114.1          | HNF4A                     | 4 | 0 |
| V\$LHX4_01        | Lhx4                                  | 2 | 0 | V\$GATA3_02    | GATA-binding factor 3                   | 0 | 7 | MA0117.1          | Mafb                      | 4 | 0 |
| V\$NFKAPPAB5_0_01 | NF-kappaB (p50)                       | 2 | 0 | V\$HNF6_Q6     | HNF6                                    | 0 | 7 | V\$CMAF_02        | C-MAF                     | 4 | 0 |
| V\$NGFIC_01       | nerve growth factor-induced protein C | 2 | 0 | V\$HOMEZ_01    | Homez                                   | 0 | 7 | V\$CP2_01         | CP2                       | 4 | 0 |
| V\$OG2_02         | OG-2                                  | 2 | 0 | V\$NKX62_Q2    | NK related homeobox factor 6-2          | 0 | 7 | V\$DAX1_01        | Dax1                      | 4 | 0 |
| V\$PLZF_02        | PLZF                                  | 2 | 0 | V\$OBOX5_01    | Obox5                                   | 0 | 7 | V\$E4BP4_01       | E4BP4                     | 4 | 0 |
| V\$RFX1_02        | X-box binding protein RFX1            | 2 | 0 | V\$POU2F3_01   | POU2F3                                  | 0 | 7 | V\$HFH4_01        | HFH4 (FOXJ1)              | 4 | 0 |
| V\$RHOX11_01      | Rhox11                                | 2 | 0 | V\$TST1_01     | POU-factor Tst-1/Oct-6                  | 0 | 7 | V\$HNF4_DR1_Q3    | HNF4 direct repeat 1      | 4 | 0 |
| V\$TAL1BETAE47_01 | Tal-1beta:E47 heterodimer             | 2 | 0 | MA0108.2       | TBP                                     | 0 | 8 | V\$IK1_01         | Ikaros 1                  | 4 | 0 |
| V\$VAX2_01        | Vax-2                                 | 2 | 0 | MA0122.1       | Nkx3-2                                  | 0 | 8 | V\$OTX_Q1         | OTX                       | 4 | 0 |
| V\$CEBPGAMMA_A_Q6 | C/EBPgamma                            | 2 | 1 | V\$CDX1_01     | Cdx-1                                   | 0 | 8 | V\$PR_Q2          | half-site matrix          | 4 | 0 |
| V\$HNF6_Q6        | HNF6                                  | 2 | 1 | V\$GATA6_01    | GATA-6                                  | 0 | 8 | V\$REX1_03        | REX1                      | 4 | 0 |
| V\$LEF1TCF1_Q4    | LEF1, TCF1                            | 2 | 1 | V\$HOXC13_01   | HOXC13                                  | 0 | 8 | V\$TAL1BETAE47_01 | Tal-1beta:E47 heterodimer | 4 | 0 |

|               |                                                   |   |   |              |                                      |   |    |                    |                                            |   |   |
|---------------|---------------------------------------------------|---|---|--------------|--------------------------------------|---|----|--------------------|--------------------------------------------|---|---|
| V\$NKX26_01   | Nkx2-6                                            | 2 | 1 | V\$SIX2_01   | Six-2                                | 0 | 8  | V\$TAL1BETAITF2_01 | Tal-1beta:ITF-2 heterodimer                | 4 | 0 |
| V\$TBP_01     | TATA binding protein                              | 2 | 1 | V\$TATA_01   | cellular and viral TATA box elements | 0 | 8  | V\$ZFX_01          | Zfx                                        | 4 | 0 |
| V\$HELIOSA_02 | Helios A                                          | 2 | 2 | V\$TCF3_01   | TCF-3                                | 0 | 8  | MA0087.1           | Sox5                                       | 4 | 1 |
| V\$HMGY_Q3    | HMGY                                              | 2 | 2 | V\$CDX2_01   | Cdx-2                                | 0 | 9  | V\$DMRT2_01        | DMRT2                                      | 4 | 1 |
| V\$TCF3_01    | TCF-3                                             | 2 | 5 | V\$FOXM1_01  | FOXM1                                | 0 | 9  | V\$DMRT4_01        | DMRT4                                      | 4 | 1 |
| V\$BRF1_01    | BRF-1                                             | 2 | 6 | V\$HMGY_Q6   | HMG Y                                | 0 | 9  | V\$NURR1_Q3        | NURR1                                      | 4 | 1 |
| V\$ZIC3_01    | zinc finger protein of the cerebellum 3           | 2 | 6 | V\$HOXA10_01 | HOXA10                               | 0 | 9  | V\$OCT_C           | Octamer binding site                       | 4 | 1 |
| MA0017.1      | NR2F1                                             | 1 | 0 | V\$HOXA9_01  | hoxa9                                | 0 | 9  | V\$SMAD_Q6         | SMAD                                       | 4 | 1 |
| MA0087.1      | Sox5                                              | 1 | 0 | V\$IRF8_Q6   | IRF8                                 | 0 | 9  | MA0035.2           | Gata1                                      | 3 | 0 |
| MA0147.1      | Myc                                               | 1 | 0 | V\$SIX6_02   | Six-6                                | 0 | 9  | MA0042.1           | FOX11                                      | 3 | 0 |
| V\$ATF_01     | activating transcription factor                   | 1 | 0 | MA0032.1     | FOXC1                                | 0 | 10 | MA0047.2           | Foxa2                                      | 3 | 0 |
| V\$CREBATF_Q6 | CREB, ATF                                         | 1 | 0 | MA0052.1     | MEF2A                                | 0 | 10 | MA0073.1           | RREB1                                      | 3 | 0 |
| V\$DLX3_01    | dlx3                                              | 1 | 0 | MA0158.1     | HOXA5                                | 0 | 10 | MA0093.1           | USF1                                       | 3 | 0 |
| V\$DLX5_01    | dlx5                                              | 1 | 0 | V\$GFI1_Q6   | Gfi1                                 | 0 | 10 | MA0104.2           | Mycn                                       | 3 | 0 |
| V\$DMRT7_01   | DMRT7                                             | 1 | 0 | V\$HOXB9_01  | HOXB9                                | 0 | 10 | F\$AMT1_Q2         | AMT1                                       | 3 | 0 |
| V\$DR3_Q4     | direct repeat 3                                   | 1 | 0 | V\$POU6F1_01 | POU6F1                               | 0 | 10 | V\$ALPHACP1_01     | alpha-CP1                                  | 3 | 0 |
| V\$DR4_Q2     | direct repeat 4                                   | 1 | 0 | V\$YY1_01    | Yin and Yang 1                       | 0 | 10 | V\$ATF_B           | ATF binding site                           | 3 | 0 |
| V\$E4F1_Q6    | E4F1                                              | 1 | 0 | V\$DOBOX4_01 | Dobox4                               | 0 | 11 | V\$BRCA_01         | BRCA1 containing protein complex with USF2 | 3 | 0 |
| V\$EGR1_01    | Egr-1/Krox-24/NGFI-A immediate-early gene product | 1 | 0 | V\$HOXB13_01 | HOXB13                               | 0 | 11 | V\$CHX10_01        | CHX10                                      | 3 | 0 |
| V\$EGR2_01    | Egr-2/Krox-20 early growth response gene product  | 1 | 0 | V\$HOXD10_01 | HOXD10                               | 0 | 11 | V\$GATA3_03        | GATA-binding factor 3                      | 3 | 0 |

|               |                                                |   |   |               |                                           |   |    |                 |                                                        |   |   |
|---------------|------------------------------------------------|---|---|---------------|-------------------------------------------|---|----|-----------------|--------------------------------------------------------|---|---|
| V\$EMX2_01    | EMX2                                           | 1 | 0 | V\$LRF_Q2     | LRF                                       | 0 | 11 | V\$GFI1B_01     | Gfi1b                                                  | 3 | 0 |
| V\$FXR_Q2     | half-site                                      | 1 | 0 | V\$OG2_01     | OG-2                                      | 0 | 11 | V\$HAND1E47_01  | Hand1:E47 heterodimer                                  | 3 | 0 |
| V\$GBX1_01    | Gbx1                                           | 1 | 0 | MA0151.1      | ARID3A                                    | 0 | 12 | V\$HNF3A_01     | FOXA1                                                  | 3 | 0 |
| V\$GBX2_01    | Gbx2                                           | 1 | 0 | V\$GATA_Q6    | GATA                                      | 0 | 12 | V\$MIZF_01      | MIZF                                                   | 3 | 0 |
| V\$GSC_01     | Gsc                                            | 1 | 0 | V\$HOXD13_01  | HOXD13                                    | 0 | 12 | V\$PAX8_B       | Pax-8 binding sites                                    | 3 | 0 |
| V\$HB9_01     | HB9                                            | 1 | 0 | V\$IK_Q5      | Ikaros                                    | 0 | 13 | V\$RFX1_02      | X-box binding protein RFX1                             | 3 | 0 |
| V\$HIC1_02    | HIC1                                           | 1 | 0 | MA0027.1      | En1                                       | 0 | 14 | V\$SMAD4_Q6     | SMAD4                                                  | 3 | 0 |
| V\$HIF1_Q3    | hypoxia induced factor                         | 1 | 0 | V\$SIX3_01    | Six-3                                     | 0 | 14 | V\$STAF_01      | Se-Cys tRNA gene transcription activating factor       | 3 | 0 |
| V\$HOXA13_03  | HOXA13                                         | 1 | 0 | V\$DRI1_01    | DRI1 b.s.                                 | 0 | 15 | V\$TCF11MAFG_01 | TCF11:MafG heterodimers                                | 3 | 0 |
| V\$HOXC10_01  | HOXC10                                         | 1 | 0 | V\$IK2_01     | Ikaros 2                                  | 0 | 15 | V\$VBP_01       | PAR-type chicken vitellogenin promoter-binding protein | 3 | 0 |
| V\$HOXC11_01  | HOXC11                                         | 1 | 0 | I\$ANTP_Q6_01 | Antp                                      | 0 | 16 | MA0018.2        | CREB1                                                  | 3 | 1 |
| V\$HOXC12_01  | HOXC12                                         | 1 | 0 | V\$LUN1_01    | LUN-1                                     | 0 | 16 | V\$DMRT3_01     | DMRT3                                                  | 3 | 1 |
| V\$HOXD11_01  | HOXD11                                         | 1 | 0 | MA0063.1      | Nkx2-5                                    | 0 | 17 | MA0132.1        | Pdx1                                                   | 3 | 5 |
| V\$HOXD12_01  | HOXD12                                         | 1 | 0 | V\$AP3_Q6     | AP-3                                      | 0 | 17 | MA0059.1        | MYC::MAX                                               | 2 | 0 |
| V\$IRX3_02    | Irx-3                                          | 1 | 0 | MA0019.1      | Ddit3::Cebpa                              | 0 | 18 | MA0140.1        | Tal1::Gata1                                            | 2 | 0 |
| V\$ISX_01     | isx                                            | 1 | 0 | MA0132.1      | Pdx1                                      | 0 | 18 | MA0155.1        | INSM1                                                  | 2 | 0 |
| V\$MYOGNF1_01 | myogenin / nuclear factor 1 or related factors | 1 | 0 | V\$ARP1_01    | apolipoprotein AI regulatory protein 1    | 0 | 18 | MA0164.1        | Nr2e3                                                  | 2 | 0 |
| V\$NFMUE1_Q6  | NF-muE1                                        | 1 | 0 | V\$ERALPHA_01 | 2 ERE half-sites with a 3bp spacer within | 0 | 18 | V\$ARNT_02      | AhR nuclear translocator homodimers                    | 2 | 0 |
| V\$NKX11_01   | Nkx1-1                                         | 1 | 0 | V\$MEF2C_01   | MEF-2C                                    | 0 | 19 | V\$ATF1_Q6      | ATF1                                                   | 2 | 0 |
| V\$OBOX2_01   | Obox2                                          | 1 | 0 | MA0033.1      | FOXL1                                     | 0 | 20 | V\$CEBPDELTA_Q6 | C/EBPdelta                                             | 2 | 0 |
| V\$OBOX3_01   | Obox3                                          | 1 | 0 | MA0109.1      | Hltf                                      | 0 | 20 | V\$CMYC_02      | c-Myc heterodimer (with a 26-29 kDa factor)            | 2 | 0 |



|                     |                                                                           |   |   |                |                                          |   |    |                |                          |   |   |
|---------------------|---------------------------------------------------------------------------|---|---|----------------|------------------------------------------|---|----|----------------|--------------------------|---|---|
| V\$OBOX6_01         | Obox6                                                                     | 1 | 0 | V\$CIZ_01      | CIZ (Cas-associated zinc finger protein) | 0 | 20 | V\$ERR2_01     | ERR2 (ESRRB)             | 2 | 0 |
| V\$PAX3_01          | Pax-3 binding sites                                                       | 1 | 0 | V\$ING4_01     | ING4                                     | 0 | 20 | V\$LBP9_01     | LBP9 (Tcfcp211)          | 2 | 0 |
| V\$PXR_Q2           | half-site matrix                                                          | 1 | 0 | V\$RUSH1A_02   | RUSH-1alpha                              | 0 | 20 | V\$MYC_Q2      | Myc                      | 2 | 0 |
| V\$RAX_01           | rax                                                                       | 1 | 0 | V\$ZNF333_01   | ZNF333                                   | 0 | 20 | V\$MYCMAX_01   | c-Myc:Max heterodimer    | 2 | 0 |
| V\$ROAZ_01          | rat Olf-1/EBF-associated zinc finger protein                              | 1 | 0 | MA0075.1       | Prrx2                                    | 0 | 21 | V\$NUR77_Q5    | NUR77                    | 2 | 0 |
| V\$RP58_01          | 58 KDA repressor protein                                                  | 1 | 0 | V\$HOXA3_01    | HOXA3 (homeobox cluster protein)         | 0 | 21 | V\$PPAR_DR1_Q2 | PPAR direct repeat 1     | 2 | 0 |
| V\$RXRG_01          | RXRG dimer                                                                | 1 | 0 | V\$LYF1_01     | LyF-1                                    | 0 | 21 | V\$RFX3_01     | RFX3 dimer               | 2 | 0 |
| V\$RXRLXRB_01       | RXR:LXR-beta                                                              | 1 | 0 | V\$YY2         | YY2                                      | 0 | 21 | V\$STRA13_01   | Stra13                   | 2 | 0 |
| V\$SP2_01           | SP2                                                                       | 1 | 0 | V\$GTF2IRD1_01 | GTF2IRD1-isoform2                        | 0 | 22 | V\$TFIIA_Q6    | TFIIA                    | 2 | 0 |
| V\$SRF_02           | serum response factor                                                     | 1 | 0 | V\$BDP1_01     | BDP1                                     | 0 | 23 | V\$WHN_B       | winged-helix factor nude | 2 | 0 |
| V\$STRA13_01        | Stra13                                                                    | 1 | 0 | V\$HOXA4_Q2    | HOXA4                                    | 0 | 23 | V\$XBP1_02     | XBP1                     | 2 | 0 |
| V\$TAL1BETAL TF2_01 | Tal-1beta:ITF-2 heterodimer                                               | 1 | 0 | V\$RPC155_01   | RPC155                                   | 0 | 23 | V\$ZNF219_01   | ZNF219                   | 2 | 0 |
| V\$TFIIA_Q6         | TFIIA                                                                     | 1 | 0 |                |                                          |   |    | V\$HMGA2_01    | HMGA2 binding site       | 2 | 0 |
| V\$ZABC1_01         | ZABC1 b.s.                                                                | 1 | 0 |                |                                          |   |    | V\$AP2REP_01   | AP-2 repressor           | 2 | 1 |
| V\$ZEC_01           | zinc finger protein expressed in embryonal cells and certain adult organs | 1 | 0 |                |                                          |   |    | V\$P300_01     | p300                     | 2 | 1 |
| V\$ZFX_01           | Zfx                                                                       | 1 | 0 |                |                                          |   |    | V\$HES1_Q2     | HES1                     | 2 | 3 |
| V\$E4BP4_01         | E4BP4                                                                     | 1 | 1 |                |                                          |   |    | MA0017.1       | NR2F1                    | 1 | 0 |
| V\$FOXP1_01         | FOXP1                                                                     | 1 | 1 |                |                                          |   |    | MA0063.1       | Nkx2-5                   | 1 | 0 |
| V\$GCNF_01          | GCNF (germ cell nuclear factor)                                           | 1 | 1 |                |                                          |   |    | MA0090.1       | TEAD1                    | 1 | 0 |
| V\$POU3F2_02        | POU3F2                                                                    | 1 | 1 |                |                                          |   |    | MA0091.1       | TAL1::TCF3               | 1 | 0 |
| V\$TRF1_01          | TRF1                                                                      | 1 | 1 |                |                                          |   |    | MA0106.1       | TP53                     | 1 | 0 |

|                    |                                     |   |    |
|--------------------|-------------------------------------|---|----|
| MA0041.1           | Foxd3                               | 1 | 2  |
| V\$LEF1_Q2         | LEF1                                | 1 | 2  |
| V\$ZNF219_01       | ZNF219                              | 1 | 2  |
| V\$NKX24_01        | Nkx2-4                              | 1 | 3  |
| I\$ANTP_Q6_01      | Antp                                | 1 | 4  |
| V\$TBR2_01         | TBR2                                | 1 | 5  |
| V\$SOX4_01         | SOX4                                | 1 | 6  |
| V\$CDPCR1_01       | cut-like homeodomain protein        | 1 | 13 |
| MA0009.1           | T                                   | 0 | 1  |
| MA0018.2           | CREB1                               | 0 | 1  |
| MA0072.1           | RORA_2                              | 0 | 1  |
| MA0130.1           | ZNF354C                             | 0 | 1  |
| MA0131.1           | MIZF                                | 0 | 1  |
| MA0133.1           | BRCA1                               | 0 | 1  |
| MA0163.1           | PLAG1                               | 0 | 1  |
| V\$AIRE_02         | AIRE                                | 0 | 1  |
| V\$DMRT1_01        | DMRT1                               | 0 | 1  |
| V\$E2F_Q2          | E2F                                 | 0 | 1  |
| V\$GATA2_03        | GATA-binding factor 2               | 0 | 1  |
| V\$GRE_C           | Glucocorticoid response element     | 0 | 1  |
| V\$LXR_Q3          | LXR                                 | 0 | 1  |
| V\$MEIS1AHOX A9_01 | Meis-1a:HOXA9 heterodimeric binding | 0 | 1  |
| V\$MTF1_02         | MTF1                                | 0 | 1  |

|                 |                                                |   |   |
|-----------------|------------------------------------------------|---|---|
| MA0141.1        | Esrrb                                          | 1 | 0 |
| MA0147.1        | Myc                                            | 1 | 0 |
| MA0258.1        | ESR2                                           | 1 | 0 |
| MA0442.1        | SOX10                                          | 1 | 0 |
| V\$AIRE_02      | AIRE                                           | 1 | 0 |
| V\$COUP_01      | COUP-TF, HNF-4                                 | 1 | 0 |
| V\$EGR3_01      | early growth response gene 3 product           | 1 | 0 |
| V\$GATA2_02     | GATA-binding factor 2                          | 1 | 0 |
| V\$GATA6_01     | GATA-6                                         | 1 | 0 |
| V\$GATA_C       | GATA binding site                              | 1 | 0 |
| V\$HBP1_Q2      | hbp1                                           | 1 | 0 |
| V\$HNF4ALPHA_Q6 | HNF4alpha                                      | 1 | 0 |
| V\$HTF_01       | HTF                                            | 1 | 0 |
| V\$LEF1TCF1_Q4  | LEF1, TCF1                                     | 1 | 0 |
| V\$LXR_Q3       | LXR                                            | 1 | 0 |
| V\$MECP2_01     | MECP2 b.s.                                     | 1 | 0 |
| V\$MYOGNF1_01   | myogenin / nuclear factor 1 or related factors | 1 | 0 |
| V\$NF1_Q6       | nuclear factor 1                               | 1 | 0 |
| V\$P63_01       | p63                                            | 1 | 0 |
| V\$PAX5_01      | B-cell-specific activating protein             | 1 | 0 |
| V\$PAX_Q6       | Pax                                            | 1 | 0 |
| V\$RFX_Q6       | RFX                                            | 1 | 0 |
| V\$ROAZ_01      | rat Olf-1/EBF-associated zinc finger           | 1 | 0 |

|                     |                                      |   |   |
|---------------------|--------------------------------------|---|---|
|                     |                                      |   |   |
| V\$PAX5_02          | B-cell-specific activating protein   | 0 | 1 |
| V\$PNR_01           | PNR                                  | 0 | 1 |
| V\$RORA2_01         | RAR-related orphan receptor alpha2   | 0 | 1 |
| V\$RORA_Q4          | RORalpha                             | 0 | 1 |
| V\$SIX6_01          | Six-6                                | 0 | 1 |
| V\$SZF11_01         | SZF1-1                               | 0 | 1 |
| V\$TATA_01          | cellular and viral TATA box elements | 0 | 1 |
| V\$TBX15_02         | T-box 15                             | 0 | 1 |
| V\$TFE_Q6           | TFE                                  | 0 | 1 |
| V\$ZID_01           | zinc finger with interaction domain  | 0 | 1 |
| MA0115.1            | NR1H2::RXRA                          | 0 | 2 |
| MA0160.1            | NR4A2                                | 0 | 2 |
| V\$DMRT3_01         | DMRT3                                | 0 | 2 |
| V\$GATA4_Q3         | GATA-4                               | 0 | 2 |
| V\$HES1_Q2          | HES1                                 | 0 | 2 |
| V\$HP1SITEFACTOR_Q6 | HP1 site factor                      | 0 | 2 |
| V\$OSF2_Q6          | Osf2                                 | 0 | 2 |
| V\$OTX_Q1           | OTX                                  | 0 | 2 |
| V\$PITX3_01         | Pitx3                                | 0 | 2 |
| MA0071.1            | RORA_1                               | 0 | 3 |
| MA0125.1            | Nobox                                | 0 | 3 |

|               |                                                                              |   |   |
|---------------|------------------------------------------------------------------------------|---|---|
|               | protein                                                                      |   |   |
| V\$SF1_Q6_01  | SF1                                                                          | 1 | 0 |
| V\$SRF_Q2     | serum response factor                                                        | 1 | 0 |
| V\$YY1_Q2     | Yin and Yang 1                                                               | 1 | 0 |
| V\$ZBRK1_Q1   | ZBRK1                                                                        | 1 | 0 |
| MA0112.2      | ESR1                                                                         | 1 | 1 |
| V\$COUPTF_Q6  | COUPTF                                                                       | 1 | 1 |
| V\$DMRT1_Q1   | DMRT1                                                                        | 1 | 1 |
| V\$GCNF_Q1    | GCNF (germ cell nuclear factor)                                              | 1 | 1 |
| V\$GLI3_Q5_01 | GLI3                                                                         | 1 | 1 |
| V\$ZNF515_Q1  | Glis binding sites                                                           | 1 | 1 |
| MA0119.1      | TLX1::NFIC                                                                   | 1 | 2 |
| MA0160.1      | NR4A2                                                                        | 1 | 2 |
| V\$CTF1_Q1    | selection of the binding sites for CTCF by HOX11 cooperative DNA binding [2] | 1 | 2 |
| V\$PLAG1_Q1   | PLAG1 binding site                                                           | 1 | 2 |
| V\$TBX18_Q1   | T-box 18                                                                     | 1 | 2 |
| V\$ZIC3_Q1    | zinc finger protein of the cerebellum 3                                      | 1 | 2 |
| MA0043.1      | HLF                                                                          | 0 | 1 |
| MA0069.1      | Pax6                                                                         | 0 | 1 |
| MA0072.1      | RORA_2                                                                       | 0 | 1 |
| MA0115.1      | NR1H2::RXRA                                                                  | 0 | 1 |
| V\$AHR_Q5     | aryl hydrocarbon /                                                           | 0 | 1 |

|              |                                    |   |   |
|--------------|------------------------------------|---|---|
|              |                                    |   |   |
| MA0146.1     | Zfx                                | 0 | 3 |
| V\$AHRHIF_Q6 | AhR, Arnt, HIF-1                   | 0 | 3 |
| V\$COUPTF_Q6 | COUPTF                             | 0 | 3 |
| V\$DMRT5_01  | DMRT5                              | 0 | 3 |
| V\$ERR1_Q2   | estrogen-related receptor alpha    | 0 | 3 |
| V\$GATA1_04  | GATA-binding factor 1              | 0 | 3 |
|              |                                    |   |   |
| V\$IRF8_Q6   | IRF8                               | 0 | 3 |
| V\$MRF2_01   | modulator recognition factor 2     | 0 | 3 |
| V\$SIX1_01   | Six-1                              | 0 | 3 |
| V\$AHR_Q5    | aryl hydrocarbon / dioxin receptor | 0 | 4 |
| V\$CDPCR3_01 | cut-like homeodomain protein       | 0 | 4 |
| V\$DEC_Q1    | DEC                                | 0 | 4 |
| V\$PBX_Q3    | Pbx                                | 0 | 4 |
|              |                                    |   |   |
| V\$RORA1_01  | RAR-related orphan receptor alpha1 | 0 | 4 |
| MA0088.1     | znf143                             | 0 | 5 |
| V\$GATA3_02  | GATA-binding                       | 0 | 5 |

|                |                                                                                                             |   |   |
|----------------|-------------------------------------------------------------------------------------------------------------|---|---|
|                | dioxin receptor                                                                                             |   |   |
| V\$AHRARNT_01  | aryl hydrocarbon receptor:Arnt heterodimers                                                                 | 0 | 1 |
| V\$BRACH_01    | Brachyury                                                                                                   | 0 | 1 |
| V\$CDPCR1_01   | cut-like homeodomain protein                                                                                | 0 | 1 |
| V\$CDPCR3HD_01 | cut-like homeodomain protein                                                                                | 0 | 1 |
| V\$FXR_IR1_Q6  | FXR inverted repeat 1                                                                                       | 0 | 1 |
| V\$PBX_Q3      | Pbx                                                                                                         | 0 | 1 |
|                |                                                                                                             |   |   |
| V\$PPARA_02    | PPAR-alpha:RXR-alpha heterodimer (peroxisome proliferator activated factor alpha:retinoid X receptor alpha) | 0 | 1 |
| V\$PXR_Q2      | half-site matrix                                                                                            | 0 | 1 |
| V\$RORA2_01    | RAR-related orphan receptor alpha2                                                                          | 0 | 1 |
| V\$RP58_01     | 58 KDA repressor protein                                                                                    | 0 | 1 |
|                |                                                                                                             |   |   |
| V\$RXRG_01     | RXRG dimer                                                                                                  | 0 | 1 |
| V\$TCF11_01    | TCF11/KCR-F1/Nrf1 homodimers                                                                                | 0 | 1 |
| V\$ZABC1_01    | ZABC1 b.s.                                                                                                  | 0 | 1 |
|                |                                                                                                             |   |   |
| V\$ZEC_01      | zinc finger protein expressed in embryonal cells and certain adult organs                                   | 0 | 1 |
| V\$ZID_01      | zinc finger with interaction domain                                                                         | 0 | 1 |
| MA0071.1       | RORA_1                                                                                                      | 0 | 2 |

|                |                                               |   |    |
|----------------|-----------------------------------------------|---|----|
|                | factor 3                                      |   |    |
| V\$ZNF515_01   | Glis binding sites                            | 0 | 5  |
| V\$HMGA2_01    | HMGA2 binding site                            | 0 | 5  |
| MA0149.1       | EWSR1-FLI1                                    | 0 | 6  |
| MA0158.1       | HOXA5                                         | 0 | 6  |
| V\$BRACH_01    | Brachyury                                     | 0 | 6  |
| V\$DBP_Q6      | DBP                                           | 0 | 6  |
| V\$GZF1_01     | plays a role in renal branching morphogenesis | 0 | 6  |
| V\$SIX2_01     | Six-2                                         | 0 | 6  |
| MA0078.1       | Sox17                                         | 0 | 7  |
| V\$SIX3_01     | Six-3                                         | 0 | 7  |
| V\$CDPCR3HD_01 | cut-like homeodomain protein                  | 0 | 8  |
| V\$GLI_Q2      | GLI                                           | 0 | 9  |
| V\$GCM_Q2      | GCM                                           | 0 | 10 |
| V\$GLI1_01     | GLI1                                          | 0 | 10 |
| V\$CHOP_01     | heterodimers of CHOP and C/EBPalpha           | 0 | 11 |
| V\$ISL1_Q6     | ISL1                                          | 0 | 11 |
| V\$SPZ1_01     | spermatogenic Zip                             | 0 | 11 |
| V\$GLI2_01     | GLI2                                          | 0 | 12 |
| MA0124.1       | NKX3-1                                        | 0 | 13 |
| V\$GATA6_01    | GATA-6                                        | 0 | 13 |

|               |                                         |   |   |
|---------------|-----------------------------------------|---|---|
| MA0146.1      | Zfx                                     | 0 | 2 |
| V\$AHRHIF_Q6  | AhR, Arnt, HIF-1                        | 0 | 2 |
| V\$ATF4_Q2    | activating transcription factor 4       | 0 | 2 |
| V\$ERR1_Q2    | estrogen-related receptor alpha         | 0 | 2 |
| V\$RORA_Q4    | RORalpha                                | 0 | 2 |
| V\$RORBETA_Q2 | RORBETA                                 | 0 | 2 |
| V\$TBX5_01    | TBX5                                    | 0 | 2 |
| V\$TEF1_Q6    | TEF-1                                   | 0 | 2 |
| MA0130.1      | ZNF354C                                 | 0 | 3 |
| V\$ING4_01    | ING4                                    | 0 | 3 |
| V\$RORA1_01   | RAR-related orphan receptor alpha1      | 0 | 3 |
| V\$CDPCR3_01  | cut-like homeodomain protein            | 0 | 4 |
| V\$GLI1_01    | GLI1                                    | 0 | 4 |
| MA0088.1      | znf143                                  | 0 | 5 |
| MA0111.1      | Spz1                                    | 0 | 5 |
| V\$AML1_Q4    | AML1                                    | 0 | 5 |
| V\$CHOP_01    | heterodimers of CHOP and C/EBPalpha     | 0 | 5 |
| V\$TBR2_01    | TBR2                                    | 0 | 5 |
| V\$ZIC1_01    | zinc finger protein of the cerebellum 1 | 0 | 5 |
| MA0033.1      | FOXL1                                   | 0 | 6 |

|                |                                          |   |    |
|----------------|------------------------------------------|---|----|
| V\$FOX1_01     | FOX1                                     | 0 | 14 |
| V\$MEF2C_01    | MEF-2C                                   | 0 | 14 |
| V\$TERALPHA_Q6 | TERALPHA                                 | 0 | 14 |
| V\$ZIC1_01     | zinc finger protein of the cerebellum 1  | 0 | 14 |
| MA0111.1       | Spz1                                     | 0 | 16 |
| MA0063.1       | Nkx2-5                                   | 0 | 17 |
| V\$CRX_Q4_01   | CRX                                      | 0 | 17 |
| V\$GATA_Q6     | GATA                                     | 0 | 17 |
| MA0122.1       | Nkx3-2                                   | 0 | 18 |
| V\$ZIC2_01     | zinc finger protein of the cerebellum 2  | 0 | 18 |
| V\$CIZ_01      | CIZ (Cas-associated zinc finger protein) | 0 | 19 |
| V\$YY1_01      | Yin and Yang 1                           | 0 | 19 |
| MA0027.1       | En1                                      | 0 | 21 |
| MA0033.1       | FOXL1                                    | 0 | 21 |
| MA0132.1       | Pdx1                                     | 0 | 21 |
| V\$IK2_01      | Ikaros 2                                 | 0 | 21 |
| V\$LUN1_01     | LUN-1                                    | 0 | 21 |
| MA0032.1       | FOXC1                                    | 0 | 22 |
| MA0075.1       | Prrx2                                    | 0 | 22 |
| V\$AP3_Q6      | AP-3                                     | 0 | 22 |
| V\$ARP1_01     | apolipoprotein AI regulatory protein 1   | 0 | 22 |
| V\$ERALPHA_01  | 2 ERE half-sites with a 3bp spacer       | 0 | 22 |

|                |                                         |   |    |
|----------------|-----------------------------------------|---|----|
| MA0124.1       | NKX3-1                                  | 0 | 6  |
| V\$DEC_Q1      | DEC                                     | 0 | 6  |
| V\$GLI2_01     | GLI2                                    | 0 | 6  |
| V\$GLI_Q2      | GLI                                     | 0 | 6  |
| V\$OSF2_Q6     | Osf2                                    | 0 | 6  |
| V\$SOX17_01    | half-site                               | 0 | 6  |
| V\$SREBP1_Q6   | SREBP-1                                 | 0 | 6  |
| V\$SREBP_Q3    | SREBP                                   | 0 | 6  |
| V\$ZNF333_01   | ZNF333                                  | 0 | 6  |
| V\$FOX1_01     | FOX1                                    | 0 | 7  |
| V\$IK2_01      | Ikaros 2                                | 0 | 7  |
| V\$DBP_Q6      | DBP                                     | 0 | 9  |
| V\$GCM_Q2      | GCM                                     | 0 | 9  |
| V\$MEF2C_01    | MEF-2C                                  | 0 | 9  |
| MA0078.1       | Sox17                                   | 0 | 10 |
| V\$IK_Q5       | Ikaros                                  | 0 | 10 |
| V\$AP3_Q6      | AP-3                                    | 0 | 11 |
| V\$DELTAEF1_01 | deltaEF1                                | 0 | 11 |
| V\$ZIC2_01     | zinc finger protein of the cerebellum 2 | 0 | 11 |
| V\$TERALPHA_Q6 | TERALPHA                                | 0 | 13 |
| V\$LYF1_01     | LyF-1                                   | 0 | 15 |
| MA0089.1       | NFE2L1::MafG                            | 0 | 16 |

|                | within            |   |    |
|----------------|-------------------|---|----|
| V\$ING4_01     | ING4              | 0 | 22 |
| MA0019.1       | Ddit3::Cebpa      | 0 | 23 |
| MA0109.1       | Hltf              | 0 | 23 |
| V\$BDP1_01     | BDP1              | 0 | 23 |
| V\$GTF2IRD1_01 | GTF2IRD1-isoform2 | 0 | 23 |
| V\$RUSH1A_02   | RUSH-1alpha       | 0 | 23 |
| V\$YY2         | YY2               | 0 | 23 |
| V\$ZNF333_01   | ZNF333            | 0 | 23 |

|                |                                           |   |    |
|----------------|-------------------------------------------|---|----|
| MA0109.1       | Hltf                                      | 0 | 18 |
| MA0122.1       | Nkx3-2                                    | 0 | 18 |
| V\$RUSH1A_02   | RUSH-1alpha                               | 0 | 18 |
| V\$TFE_Q6      | TFE                                       | 0 | 18 |
| V\$ERALPHA_01  | 2 ERE half-sites with a 3bp spacer within | 0 | 19 |
| V\$LUN1_01     | LUN-1                                     | 0 | 19 |
| MA0019.1       | Ddit3::Cebpa                              | 0 | 20 |
| V\$ARP1_01     | apolipoprotein AI regulatory protein 1    | 0 | 20 |
| V\$BDP1_01     | BDP1                                      | 0 | 20 |
| V\$YY2         | YY2                                       | 0 | 21 |
| MA0032.1       | FOXC1                                     | 0 | 22 |
| V\$GTF2IRD1_01 | GTF2IRD1-isoform2                         | 0 | 23 |
| V\$RPC155_01   | RPC155                                    | 0 | 23 |
